# Supplementary material for: Biodiversity of Duckweed (Lemnaceae) in Water Reservoirs of Ukraine and China Assessed by Chloroplast DNA Barcoding
Source: MDPI journal article supplement (doi:10.3390/plants11111468), 2022-05-30
Supplement: s1 [file s1]

S1A

|           | 1                                                                                                     | 40  | 60  | 80  | 100 |
|-----------|-------------------------------------------------------------------------------------------------------|-----|-----|-----|-----|
| DW30      | TTTAATTTTAGAAGAAATAAAAGTACGTACGTAATTTTTTTTGACTTAGACTTGCTTTTGTGTTCTTCGAATTATATCAACATTGCACCTCTAACAATTAC |     |     |     |     |
| DW28      | .....T.....T.....                                                                                     |     |     |     |     |
| DW33      | .....T.....T.....                                                                                     |     |     |     |     |
| DW36      | .....T.....T.....                                                                                     |     |     |     |     |
| DW37      | .....T.....T.....                                                                                     |     |     |     |     |
| DW39      | .....T.....T.....                                                                                     |     |     |     |     |
| DW40      | .....T.....T.....                                                                                     |     |     |     |     |
| DW75      | .....T.....T.....                                                                                     |     |     |     |     |
| DW78      | .....T.....T.....                                                                                     |     |     |     |     |
| DW96      | .....T.....T.....                                                                                     |     |     |     |     |
| DW98      | .....T.....T.....                                                                                     |     |     |     |     |
| DW100     | .....T.....T.....                                                                                     |     |     |     |     |
| K40       | .....T.....T.....                                                                                     |     |     |     |     |
| K42       | .....T.....T.....                                                                                     |     |     |     |     |
| K47       | .....T.....T.....                                                                                     |     |     |     |     |
| RDSC 5545 | .....T.....T.....                                                                                     |     |     |     |     |
| RDSC 5546 | .....T.....T.....                                                                                     |     |     |     |     |
| RDSC 5547 | .....T.....T.....                                                                                     |     |     |     |     |
| RDSC 5548 | .....T.....T.....                                                                                     |     |     |     |     |
| NB0003    | .....T.....T.....                                                                                     |     |     |     |     |
| NB0004    | .....T.....T.....                                                                                     |     |     |     |     |
| NB0093    | .....T.....T.....                                                                                     |     |     |     |     |
| G2        | .....T.....T.....                                                                                     |     |     |     |     |
| H1        | .....T.....T.....                                                                                     |     |     |     |     |
| I1        | .....T.....T.....                                                                                     |     |     |     |     |
| J1        | .....T.....T.....                                                                                     |     |     |     |     |
| L1        | .....T.....T.....                                                                                     |     |     |     |     |
| O1        | .....T.....T.....                                                                                     |     |     |     |     |
| Ya1       | .....T.....T.....                                                                                     |     |     |     |     |
| RDSC 2014 | .....T.....T.....                                                                                     |     |     |     |     |
| MN419335  | .....T.....T.....                                                                                     |     |     |     |     |
| GU454201  | .....T.....T.....                                                                                     |     |     |     |     |
| GU454202  | .....T.....T.....                                                                                     |     |     |     |     |
| GU454203  | .....T.....T.....                                                                                     |     |     |     |     |
| GU454204  | .....T.....T.....                                                                                     |     |     |     |     |
| GU454205  | .....T.....T.....                                                                                     |     |     |     |     |
| GU454206  | .....T.....T.....                                                                                     |     |     |     |     |
| GU454208  | .....T.....T.....                                                                                     |     |     |     |     |
|           | 120                                                                                                   | 140 | 160 | 180 | 200 |
| DW30      | TTATTCGTTGAGAGAATACCTCCGGGAAGGACTGATTTTAGGATTAGTAATTAGCAGATCCTCTCGCTTCTTCCTTCCCGTTTTTATGTTCTTAGTATAA  |     |     |     |     |
| DW28      | .....T.....T.....                                                                                     |     |     |     |     |
| DW33      | .....T.....T.....                                                                                     |     |     |     |     |
| DW36      | .....T.....T.....                                                                                     |     |     |     |     |
| DW37      | .....T.....T.....                                                                                     |     |     |     |     |
| DW39      | .....T.....T.....                                                                                     |     |     |     |     |
| DW40      | .....T.....T.....                                                                                     |     |     |     |     |
| DW75      | .....T.....T.....                                                                                     |     |     |     |     |
| DW78      | .....T.....T.....                                                                                     |     |     |     |     |
| DW96      | .....T.....T.....                                                                                     |     |     |     |     |
| DW98      | .....T.....T.....                                                                                     |     |     |     |     |
| DW100     | .....T.....T.....                                                                                     |     |     |     |     |
| K40       | .....T.....T.....                                                                                     |     |     |     |     |
| K42       | .....T.....T.....                                                                                     |     |     |     |     |
| K47       | .....T.....T.....                                                                                     |     |     |     |     |
| RDSC 5545 | .....T.....T.....                                                                                     |     |     |     |     |
| RDSC 5546 | .....T.....T.....                                                                                     |     |     |     |     |
| RDSC 5547 | .....T.....T.....                                                                                     |     |     |     |     |
| RDSC 5548 | .....T.....T.....                                                                                     |     |     |     |     |
| NB0003    | .....T.....T.....                                                                                     |     |     |     |     |
| NB0004    | .....T.....T.....                                                                                     |     |     |     |     |
| NB0093    | .....T.....T.....                                                                                     |     |     |     |     |
| G2        | .....T.....T.....                                                                                     |     |     |     |     |
| H1        | .....T.....T.....                                                                                     |     |     |     |     |
| I1        | .....T.....T.....                                                                                     |     |     |     |     |
| J1        | .....T.....T.....                                                                                     |     |     |     |     |
| L1        | .....T.....T.....                                                                                     |     |     |     |     |
| O1        | .....T.....T.....                                                                                     |     |     |     |     |
| Ya1       | .....T.....T.....                                                                                     |     |     |     |     |
| RDSC 2014 | .....T.....T.....                                                                                     |     |     |     |     |
| MN419335  | .....T.....T.....                                                                                     |     |     |     |     |
| GU454201  | .....T.....T.....                                                                                     |     |     |     |     |
| GU454202  | .....T.....T.....                                                                                     |     |     |     |     |
| GU454203  | .....T.....T.....                                                                                     |     |     |     |     |
| GU454204  | .....T.....T.....                                                                                     |     |     |     |     |
| GU454205  | .....T.....T.....                                                                                     |     |     |     |     |
| GU454206  | .....T.....T.....                                                                                     |     |     |     |     |
| GU454208  | .....T.....T.....                                                                                     |     |     |     |     |

S1A

|           |                                                                                              |                                                                                      |     |     |     |      |
|-----------|----------------------------------------------------------------------------------------------|--------------------------------------------------------------------------------------|-----|-----|-----|------|
|           |                                                                                              | 220                                                                                  | 240 | 260 | 280 | 300  |
| DW30      | TGTAACGGAAACCTTTT                                                                            | TTTGTATGCGTTGCAACGCAACAAACAAGGTATTTATCAATTGACAAAAATACCCAGGACCTAACCCAATAAGTATCTTCTTGT |     |     |     |      |
| DW28      |                                                                                              |                                                                                      |     |     |     | T..T |
| DW33      |                                                                                              |                                                                                      |     |     |     | T..T |
| DW36      |                                                                                              |                                                                                      |     |     |     | T..T |
| DW37      |                                                                                              |                                                                                      |     |     |     | T..T |
| DW39      |                                                                                              |                                                                                      |     |     |     | T..T |
| DW40      |                                                                                              |                                                                                      |     |     |     | T..T |
| DW75      |                                                                                              |                                                                                      |     |     |     |      |
| DW78      |                                                                                              |                                                                                      |     |     |     |      |
| DW96      |                                                                                              |                                                                                      |     |     |     |      |
| DW98      |                                                                                              |                                                                                      |     |     |     |      |
| DW100     |                                                                                              |                                                                                      |     |     |     |      |
| K40       |                                                                                              |                                                                                      |     |     |     |      |
| K42       |                                                                                              |                                                                                      |     |     |     |      |
| K47       |                                                                                              |                                                                                      |     |     |     |      |
| RDSC 5545 |                                                                                              |                                                                                      |     |     |     | T..T |
| RDSC 5546 | A..                                                                                          |                                                                                      |     |     |     | T..T |
| RDSC 5547 |                                                                                              |                                                                                      |     |     |     |      |
| RDSC 5548 |                                                                                              |                                                                                      |     |     |     |      |
| NB0003    |                                                                                              |                                                                                      |     |     |     |      |
| NB0004    |                                                                                              |                                                                                      |     |     |     |      |
| NB0093    |                                                                                              |                                                                                      |     |     |     |      |
| G2        |                                                                                              |                                                                                      |     |     |     | T..T |
| H1        |                                                                                              |                                                                                      |     |     |     |      |
| I1        |                                                                                              |                                                                                      |     |     |     |      |
| J1        |                                                                                              |                                                                                      |     |     |     |      |
| L1        |                                                                                              |                                                                                      |     |     |     |      |
| O1        |                                                                                              |                                                                                      |     |     |     |      |
| Ya1       |                                                                                              |                                                                                      |     |     |     |      |
| RDSC 2014 |                                                                                              |                                                                                      |     |     |     |      |
| MN419335  |                                                                                              |                                                                                      |     |     |     |      |
| GU454201  |                                                                                              |                                                                                      |     |     |     |      |
| GU454202  |                                                                                              |                                                                                      |     |     |     |      |
| GU454203  |                                                                                              |                                                                                      |     |     |     |      |
| GU454204  |                                                                                              |                                                                                      |     |     |     |      |
| GU454205  |                                                                                              |                                                                                      |     |     |     |      |
| GU454206  |                                                                                              |                                                                                      |     |     |     |      |
| GU454208  |                                                                                              |                                                                                      |     |     |     |      |
|           |                                                                                              | 320                                                                                  | 340 | 360 | 380 | 400  |
| DW30      | AAACTTTAATTTAATTAGAAATAAAATTATAAAATTAAGTTCTCAATTAAATTAATTGATTTAATCTATTCCATTAAAAAATCCCATAAAAA |                                                                                      |     |     |     | AGAA |
| DW28      |                                                                                              |                                                                                      |     |     |     | T..T |
| DW33      |                                                                                              |                                                                                      |     |     |     | T..T |
| DW36      |                                                                                              |                                                                                      |     |     |     | T..T |
| DW37      |                                                                                              |                                                                                      |     |     |     | T..T |
| DW39      |                                                                                              |                                                                                      |     |     |     | T..T |
| DW40      |                                                                                              |                                                                                      |     |     |     | T..T |
| DW75      |                                                                                              |                                                                                      |     |     |     |      |
| DW78      |                                                                                              |                                                                                      |     |     |     |      |
| DW96      |                                                                                              |                                                                                      |     |     |     |      |
| DW98      |                                                                                              |                                                                                      |     |     |     |      |
| DW100     |                                                                                              |                                                                                      |     |     |     |      |
| K40       |                                                                                              |                                                                                      |     |     |     |      |
| K42       |                                                                                              |                                                                                      |     |     |     |      |
| K47       |                                                                                              |                                                                                      |     |     |     |      |
| RDSC 5545 |                                                                                              |                                                                                      |     |     |     | T..T |
| RDSC 5546 |                                                                                              |                                                                                      |     |     |     |      |
| RDSC 5547 |                                                                                              |                                                                                      |     |     |     |      |
| RDSC 5548 |                                                                                              |                                                                                      |     |     |     |      |
| NB0003    |                                                                                              |                                                                                      |     |     |     |      |
| NB0004    |                                                                                              |                                                                                      |     |     |     |      |
| NB0093    |                                                                                              |                                                                                      |     |     |     |      |
| G2        |                                                                                              |                                                                                      |     |     |     | T..T |
| H1        |                                                                                              |                                                                                      |     |     |     |      |
| I1        |                                                                                              |                                                                                      |     |     |     |      |
| J1        |                                                                                              |                                                                                      |     |     |     |      |
| L1        |                                                                                              |                                                                                      |     |     |     |      |
| O1        |                                                                                              |                                                                                      |     |     |     |      |
| Ya1       |                                                                                              |                                                                                      |     |     |     |      |
| RDSC 2014 |                                                                                              |                                                                                      |     |     |     |      |
| MN419335  |                                                                                              |                                                                                      |     |     |     |      |
| GU454201  |                                                                                              |                                                                                      |     |     |     |      |
| GU454202  |                                                                                              |                                                                                      |     |     |     |      |
| GU454203  |                                                                                              |                                                                                      |     |     |     |      |
| GU454204  |                                                                                              |                                                                                      |     |     |     |      |
| GU454205  |                                                                                              |                                                                                      |     |     |     |      |
| GU454206  |                                                                                              |                                                                                      |     |     |     |      |
| GU454208  |                                                                                              |                                                                                      |     |     |     |      |

S1A

|           |                                                                              |     |  |     |  |     |
|-----------|------------------------------------------------------------------------------|-----|--|-----|--|-----|
|           |                                                                              | 420 |  | 440 |  | 460 |
|           |                                                                              |     |  |     |  |     |
| DW30      | AATCAACCAAAAAAGGGGCGAAGTGATACAAAAAGAACTCTGTTCTTTGTTAGTCCTATCTATAAGAGGAGAGTAT |     |  |     |  |     |
| DW28      | .....                                                                        |     |  |     |  |     |
| DW33      | .....                                                                        |     |  |     |  |     |
| DW36      | .....                                                                        |     |  |     |  |     |
| DW37      | .....                                                                        |     |  |     |  |     |
| DW39      | .....                                                                        |     |  |     |  |     |
| DW40      | .....                                                                        |     |  |     |  |     |
| DW75      | .....                                                                        |     |  |     |  |     |
| DW78      | .....                                                                        |     |  |     |  |     |
| DW96      | .....                                                                        |     |  |     |  |     |
| DW98      | .....                                                                        |     |  |     |  |     |
| DW100     | .....                                                                        |     |  |     |  |     |
| K40       | .....                                                                        |     |  |     |  |     |
| K42       | .....                                                                        |     |  |     |  |     |
| K47       | .....                                                                        |     |  |     |  |     |
| RDSC 5545 | .....                                                                        |     |  |     |  |     |
| RDSC 5546 | .....                                                                        |     |  |     |  |     |
| RDSC 5547 | .....                                                                        |     |  |     |  |     |
| RDSC 5548 | .....                                                                        |     |  |     |  |     |
| NB0003    | .....                                                                        |     |  |     |  |     |
| NB0004    | .....                                                                        |     |  |     |  |     |
| NB0093    | .....                                                                        |     |  |     |  |     |
| G2        | .....                                                                        |     |  |     |  |     |
| H1        | .....                                                                        |     |  |     |  |     |
| I1        | .....                                                                        |     |  |     |  |     |
| J1        | .....                                                                        |     |  |     |  |     |
| L1        | .....                                                                        |     |  |     |  |     |
| O1        | .....                                                                        |     |  |     |  |     |
| Ya1       | .....                                                                        |     |  |     |  |     |
| RDSC 2014 | .....                                                                        |     |  |     |  |     |
| MN419335  | .....                                                                        |     |  |     |  |     |
| GU454201  | .....                                                                        |     |  |     |  |     |
| GU454202  | .....                                                                        |     |  |     |  |     |
| GU454203  | .....                                                                        |     |  |     |  |     |
| GU454204  | .....                                                                        |     |  |     |  |     |
| GU454205  | .....                                                                        |     |  |     |  |     |
| GU454206  | .....                                                                        |     |  |     |  |     |
| GU454208  | .....                                                                        |     |  |     |  |     |

S1B

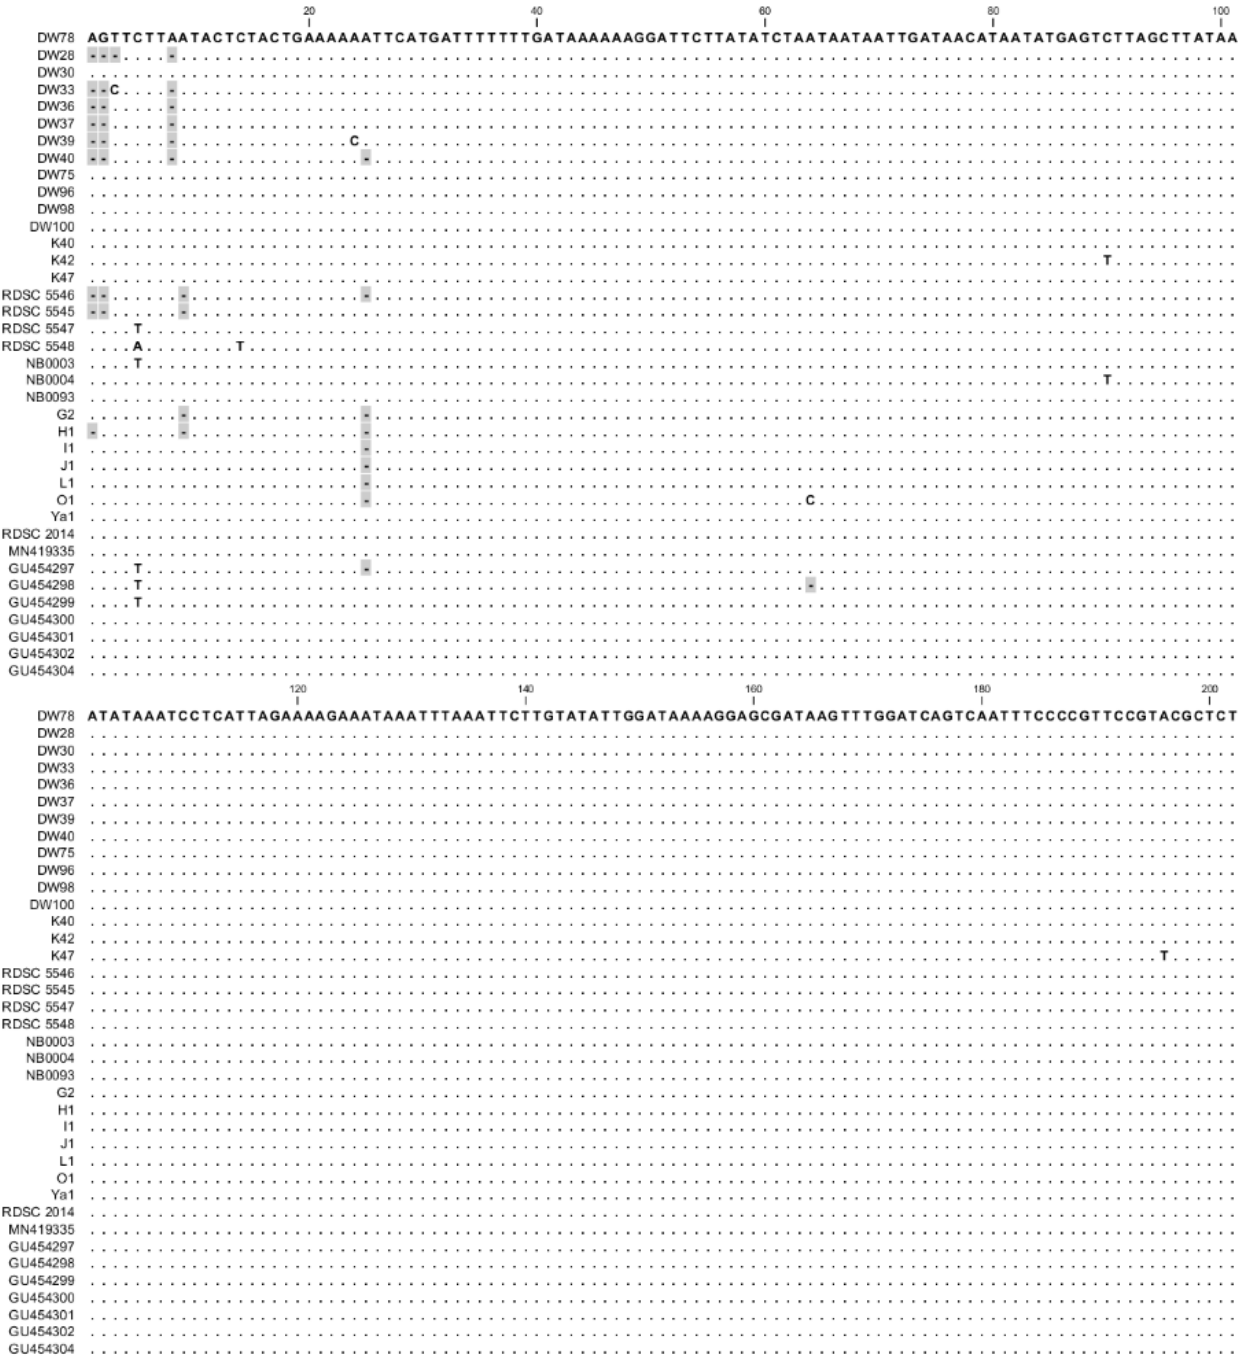

S1B

|           |                                                                                                        |     |     |     |     |     |             |
|-----------|--------------------------------------------------------------------------------------------------------|-----|-----|-----|-----|-----|-------------|
|           |                                                                                                        | 220 | 240 | 260 | 280 | 300 |             |
| DW78      | TCCAGTGAGCAAGTACTTTCTTTATTAGCTTATGTTTTTCCACAATACTTTATGTTAAATATTAGAATAACCATTTTGGTAACGAACAAATCATAATCTTA  |     |     |     |     |     |             |
| DW28      |                                                                                                        |     |     |     |     |     |             |
| DW30      |                                                                                                        |     |     |     |     |     |             |
| DW33      |                                                                                                        |     |     |     |     |     |             |
| DW36      |                                                                                                        |     |     |     |     |     |             |
| DW37      |                                                                                                        |     |     |     |     |     |             |
| DW39      |                                                                                                        |     |     |     |     |     |             |
| DW40      |                                                                                                        |     |     |     |     |     |             |
| DW75      |                                                                                                        |     |     |     |     |     |             |
| DW96      |                                                                                                        |     |     |     |     |     |             |
| DW98      |                                                                                                        |     |     |     |     |     |             |
| DW100     |                                                                                                        |     |     |     |     |     |             |
| K40       |                                                                                                        |     |     |     |     |     | T           |
| K42       |                                                                                                        |     |     |     |     |     |             |
| K47       |                                                                                                        |     |     |     |     |     |             |
| RDSC 5546 |                                                                                                        |     |     |     |     |     |             |
| RDSC 5545 |                                                                                                        |     |     |     |     |     |             |
| RDSC 5547 |                                                                                                        |     |     |     |     |     |             |
| RDSC 5548 |                                                                                                        |     |     |     |     |     |             |
| NB0003    |                                                                                                        |     |     |     |     |     |             |
| NB0004    |                                                                                                        |     |     |     |     |     | T           |
| NB0093    |                                                                                                        |     |     |     |     |     |             |
| G2        |                                                                                                        |     |     |     |     |     |             |
| H1        |                                                                                                        |     |     |     |     |     |             |
| I1        |                                                                                                        |     |     |     |     |     |             |
| J1        |                                                                                                        |     |     |     |     |     |             |
| L1        |                                                                                                        |     |     |     |     |     |             |
| O1        |                                                                                                        |     |     |     |     |     |             |
| Ya1       |                                                                                                        |     |     |     |     |     |             |
| RDSC 2014 |                                                                                                        |     |     |     |     |     |             |
| MN419335  |                                                                                                        |     |     |     |     |     |             |
| GU454297  |                                                                                                        |     |     |     |     |     | Y . W . Y . |
| GU454298  |                                                                                                        |     |     |     |     |     |             |
| GU454299  |                                                                                                        |     |     |     |     |     |             |
| GU454300  |                                                                                                        |     |     |     |     |     |             |
| GU454301  |                                                                                                        |     |     |     |     |     |             |
| GU454302  |                                                                                                        |     |     |     |     |     |             |
| GU454304  |                                                                                                        |     |     |     |     |     |             |
|           |                                                                                                        | 320 | 340 | 360 | 380 | 400 |             |
| DW78      | ATTTTCAGAAAAAAATTCATGAATTTGAAAAATTCAGTTTTTTTAGAAAAAAACACTTAATTAAAAAAATTTGTTCTTTATTTTTTCATATTTTTTTTTTGT |     |     |     |     |     |             |
| DW28      |                                                                                                        |     |     |     |     |     |             |
| DW30      |                                                                                                        |     |     |     |     |     |             |
| DW33      |                                                                                                        |     |     |     |     |     |             |
| DW36      |                                                                                                        |     |     |     |     |     |             |
| DW37      |                                                                                                        |     |     |     |     |     |             |
| DW39      |                                                                                                        |     |     |     |     |     |             |
| DW40      |                                                                                                        |     |     |     |     |     |             |
| DW75      |                                                                                                        |     |     |     |     |     |             |
| DW96      |                                                                                                        |     |     |     |     |     |             |
| DW98      |                                                                                                        |     |     |     |     |     |             |
| DW100     |                                                                                                        |     |     |     |     |     |             |
| K40       |                                                                                                        |     |     |     |     |     |             |
| K42       |                                                                                                        |     |     |     |     |     |             |
| K47       |                                                                                                        |     |     |     |     |     |             |
| RDSC 5546 |                                                                                                        |     |     |     |     |     |             |
| RDSC 5545 |                                                                                                        |     |     |     |     |     |             |
| RDSC 5547 |                                                                                                        |     |     |     |     |     |             |
| RDSC 5548 |                                                                                                        |     |     |     |     |     |             |
| NB0003    |                                                                                                        |     |     |     |     |     |             |
| NB0004    |                                                                                                        |     |     |     |     |     |             |
| NB0093    |                                                                                                        |     |     |     |     |     |             |
| G2        |                                                                                                        |     |     |     |     |     |             |
| H1        |                                                                                                        |     |     |     |     |     |             |
| I1        |                                                                                                        |     |     |     |     |     |             |
| J1        |                                                                                                        |     |     |     |     |     |             |
| L1        |                                                                                                        |     |     |     |     |     |             |
| O1        |                                                                                                        |     |     |     |     |     |             |
| Ya1       |                                                                                                        |     |     |     |     |     |             |
| RDSC 2014 |                                                                                                        |     |     |     |     |     |             |
| MN419335  |                                                                                                        |     |     |     |     |     |             |
| GU454297  |                                                                                                        |     |     |     |     |     |             |
| GU454298  |                                                                                                        |     |     |     |     |     |             |
| GU454299  |                                                                                                        |     |     |     |     |     |             |
| GU454300  |                                                                                                        |     |     |     |     |     |             |
| GU454301  |                                                                                                        |     |     |     |     |     |             |
| GU454302  |                                                                                                        |     |     |     |     |     |             |
| GU454304  |                                                                                                        |     |     |     |     |     |             |

S1B

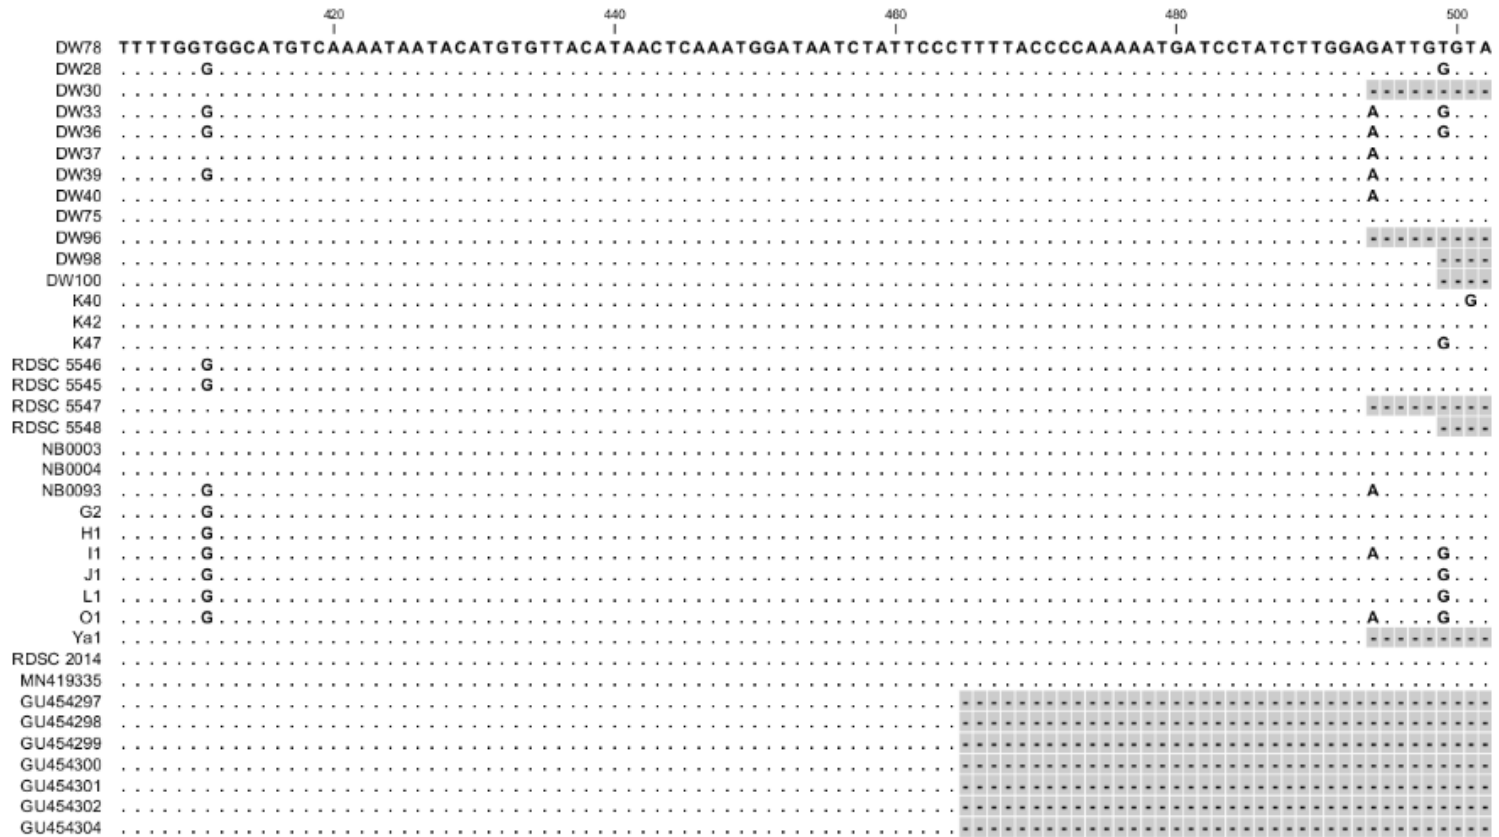

**Supplemental Figure S1.** Nucleotide alignment of *atpH-atpF* and *psbK-psbI* spacers sequences of *Spirodela polyrrhiza* collected in Ukraine and China (for ecotype details see supplemental Table 2). Matching residues are shown as dots.

**A.** Nucleotide alignment of *atpH*–*atpF* barcodes including representative sequences of *S. polyrhiza* specimens available in GenBank: MN419335, USA; GU454201, Hong Kong; GU454202, India; GU454203, Malaysia; GU454204, USA; GU454205, Mexico; GU454206, Canada; GU454208, Europe.

**B.** Nucleotide alignment of *psbK-psbI* barcodes including representative sequences of *S. polyrhiza* specimens available in GenBank: MN419335, USA; GU454297, Hong Kong; GU454298, India; GU454299, Malaysia; GU454300, USA; GU454301, Mexico; GU454302, Canada; GU454304, Europe.

S2A

|            |  |                                                                                                      |       |       |       |       |
|------------|--|------------------------------------------------------------------------------------------------------|-------|-------|-------|-------|
|            |  | 20                                                                                                   | 40    | 60    | 80    | 100   |
| NB0014     |  | TTCTATAAGAAAAAGTACATAATAGACTTTTTTTACTTAGACTTGTTTTCTGCTTCTTCGAATTATATCAACATTGCACTCTAACAATTACTTTAGT    |       |       |       |       |
| NB0022     |  | .....                                                                                                | ..... | ..... | ..... | ..... |
| Gu1        |  | .....                                                                                                | ..... | ..... | ..... | ..... |
| Ya3        |  | .....                                                                                                | ..... | ..... | ..... | ..... |
| RDSC EL019 |  | .....                                                                                                | ..... | ..... | ..... | ..... |
| GU454209   |  | .....                                                                                                | ..... | ..... | ..... | ..... |
| GU454211   |  | .....                                                                                                | ..... | ..... | ..... | ..... |
| GU454212   |  | .....                                                                                                | ..... | ..... | ..... | ..... |
| GU454213   |  | .....                                                                                                | ..... | ..... | ..... | ..... |
|            |  | 120                                                                                                  | 140   | 160   | 180   | 200   |
| NB0014     |  | TGATAGAATACCTCCGGGAAGGACTGATTTTAGGATTAGTAATTAGGAGATCCTCTCGCTTTCTTCCTTCCCGTTTTTAGTTCTTAGTATAATGGAAACC |       |       |       |       |
| NB0022     |  | .....                                                                                                | ..... | ..... | ..... | ..... |
| Gu1        |  | .....                                                                                                | ..... | ..... | ..... | ..... |
| Ya3        |  | .....                                                                                                | ..... | ..... | ..... | ..... |
| RDSC EL019 |  | .....                                                                                                | ..... | ..... | ..... | ..... |
| GU454209   |  | .....                                                                                                | ..... | ..... | ..... | ..... |
| GU454211   |  | .....                                                                                                | ..... | ..... | ..... | ..... |
| GU454212   |  | .....                                                                                                | ..... | ..... | ..... | ..... |
| GU454213   |  | .....                                                                                                | ..... | ..... | ..... | ..... |
|            |  | 220                                                                                                  | 240   | 260   | 280   | 300   |
| NB0014     |  | TTTTTTTAGTATGCGTTGCAACGCAACAAACAAGGTATTTATCAATTGACAAAATACCCAGGACCTAACCCAATAAGTATCTTCTTGTAATTGTAACTT  |       |       |       |       |
| NB0022     |  | .....                                                                                                | ..... | ..... | ..... | ..... |
| Gu1        |  | .....                                                                                                | ..... | ..... | ..... | ..... |
| Ya3        |  | .....                                                                                                | ..... | ..... | ..... | ..... |
| RDSC EL019 |  | .....                                                                                                | ..... | ..... | ..... | ..... |
| GU454209   |  | .....                                                                                                | ..... | ..... | ..... | ..... |
| GU454211   |  | .....                                                                                                | ..... | ..... | ..... | ..... |
| GU454212   |  | .....                                                                                                | ..... | ..... | ..... | ..... |
| GU454213   |  | .....                                                                                                | ..... | ..... | ..... | ..... |
|            |  | 320                                                                                                  | 340   | 360   | 380   | 400   |
| NB0014     |  | TAATTTAATTAGAATATTTAATTTAGAATATTTAATTATTATAAAATAATAAATAAATTAAGTTCTCAATTAATTAATTCAATATATTCCATTTTAA    |       |       |       |       |
| NB0022     |  | .....                                                                                                | ..... | ..... | ..... | ..... |
| Gu1        |  | .....                                                                                                | ..... | ..... | ..... | ..... |
| Ya3        |  | .....                                                                                                | ..... | ..... | ..... | ..... |
| RDSC EL019 |  | .....                                                                                                | ..... | ..... | ..... | ..... |
| GU454209   |  | .....                                                                                                | ..... | ..... | ..... | ..... |
| GU454211   |  | .....                                                                                                | ..... | ..... | ..... | ..... |
| GU454212   |  | .....                                                                                                | ..... | ..... | ..... | ..... |
| GU454213   |  | .....                                                                                                | ..... | ..... | ..... | ..... |
|            |  | 420                                                                                                  | 440   | 460   | 480   |       |
| NB0014     |  | AATCCCATACCATAAAAAAAAAAGAAATCAACCAAAGGGGGCGAAGTAATACAAAAGAACTCTGTTCTTTGTTAGTCCTATCTATAAGAGGAGAGTAT   |       |       |       |       |
| NB0022     |  | .....                                                                                                | ..... | ..... | ..... | ..... |
| Gu1        |  | .....                                                                                                | ..... | ..... | ..... | ..... |
| Ya3        |  | .....                                                                                                | ..... | ..... | ..... | ..... |
| RDSC EL019 |  | .....                                                                                                | ..... | ..... | ..... | ..... |
| GU454209   |  | .....                                                                                                | ..... | ..... | ..... | ..... |
| GU454211   |  | .....                                                                                                | ..... | ..... | ..... | ..... |
| GU454212   |  | .....                                                                                                | ..... | ..... | ..... | ..... |
| GU454213   |  | .....                                                                                                | ..... | ..... | ..... | ..... |

S2B

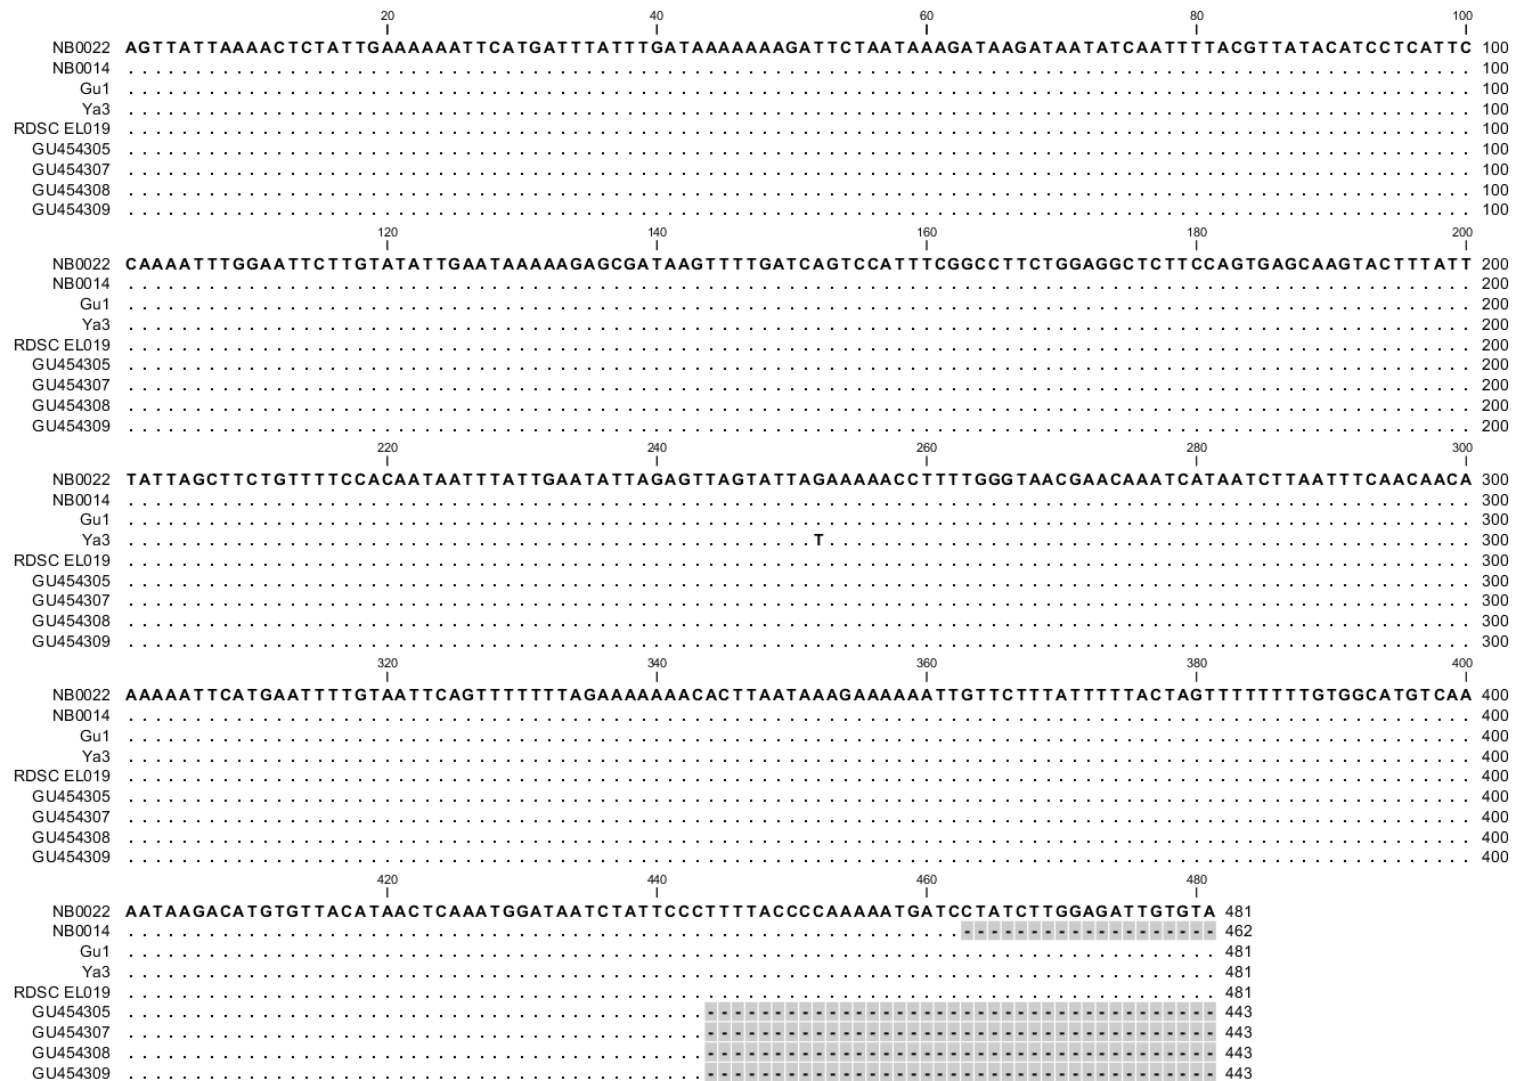

**Supplemental Figure S2.** Nucleotide alignment of *atpH-atpF* and *psbK-psbI* spacers of *Landoltia punctata* (for ecotypes details see supplemental Table 2). Matching residues are shown as dots.

**A.** Nucleotide alignment of *atpH-atpF* barcodes including the representative sequences of *La. punctata* from different parts of the world available in the GenBank: GU454209, South Africa; GU454211, India; GU454212, USA; GU454213, Australia.

**B.** Nucleotide alignment of *psbK-psbI* barcodes including the representative sequences of *La. punctata* from different parts of the world available in the GenBank: GU454305, South Africa; GU454307, India; GU454308, USA; GU454309, Australia.



S3A

|          |                                                                                                    |     |     |     |     |     |
|----------|----------------------------------------------------------------------------------------------------|-----|-----|-----|-----|-----|
|          |                                                                                                    | 20  | 40  | 60  | 80  | 100 |
| DW31     | TTCTAGAATAAAAAAGTACGTAATAGACTTTTGGACTTTGCTTTTCTTCGAATTATATCAACATTGTACTCTAACAATTACTTATTCGTT         |     |     |     |     |     |
| DW38     | .....                                                                                              |     |     |     |     |     |
| DW41     | .....                                                                                              |     |     |     |     |     |
| DW72     | .....                                                                                              |     |     |     |     |     |
| DW73     | .....                                                                                              |     |     |     |     |     |
| DW74     | .....                                                                                              |     |     |     |     |     |
| DW76     | .....                                                                                              |     |     |     |     |     |
| DW99     | .....                                                                                              |     |     |     |     |     |
| DW105    | .....                                                                                              |     |     |     |     |     |
| K38      | .....                                                                                              |     |     |     |     |     |
| K39      | .....                                                                                              |     |     |     |     |     |
| K41      | .....                                                                                              |     |     |     |     |     |
| K43      | .....                                                                                              |     |     |     |     |     |
| K44      | .....                                                                                              |     |     |     |     |     |
| K45      | .....                                                                                              |     |     |     |     |     |
| K46      | .....                                                                                              |     |     |     |     |     |
| K48      | .....                                                                                              |     |     |     |     |     |
| Ya2      | .....                                                                                              |     |     |     |     |     |
| DQ400350 | .....                                                                                              |     |     |     |     |     |
| GU454226 | .....                                                                                              |     |     |     |     |     |
| GU454227 | .....                                                                                              |     |     |     |     |     |
| GU454228 | .....                                                                                              |     |     |     |     |     |
| GU454229 | .....                                                                                              |     |     |     |     |     |
| GU454230 | .....                                                                                              |     |     |     |     |     |
| GU454231 | .....                                                                                              |     |     |     |     |     |
|          |                                                                                                    | 120 | 140 | 160 | 180 | 200 |
| DW31     | GAGAGAATACCTCCGGGAAGGACTGATTTTAGGATTAGTAATTAGCAGATCCTCTCGCTTCTTCTCCGTTTTTCAGTTCTTAGTATAATGTAATGCCA |     |     |     |     |     |
| DW38     | .....                                                                                              |     |     |     |     |     |
| DW41     | .....                                                                                              |     |     |     |     |     |
| DW72     | .....                                                                                              |     |     |     |     |     |
| DW73     | .....                                                                                              |     |     |     |     |     |
| DW74     | .....                                                                                              |     |     |     |     |     |
| DW76     | .....                                                                                              |     |     |     |     |     |
| DW99     | .....                                                                                              |     |     |     |     |     |
| DW105    | .....                                                                                              |     |     |     |     |     |
| K38      | .....                                                                                              |     |     |     |     |     |
| K39      | .....                                                                                              |     |     |     |     |     |
| K41      | .....                                                                                              |     |     |     |     |     |
| K43      | .....                                                                                              |     |     |     |     |     |
| K44      | .....                                                                                              |     |     |     |     |     |
| K45      | .....                                                                                              |     |     |     |     |     |
| K46      | .....                                                                                              |     |     |     |     |     |
| K48      | .....                                                                                              |     |     |     |     |     |
| Ya2      | .....                                                                                              |     |     |     |     |     |
| DQ400350 | .....                                                                                              |     |     |     |     |     |
| GU454226 | .....                                                                                              |     |     |     |     |     |
| GU454227 | .....                                                                                              |     |     |     |     |     |
| GU454228 | .....                                                                                              |     |     |     |     |     |
| GU454229 | .....                                                                                              |     |     |     |     |     |
| GU454230 | .....                                                                                              |     |     |     |     |     |
| GU454231 | .....                                                                                              |     |     |     |     |     |

S3A

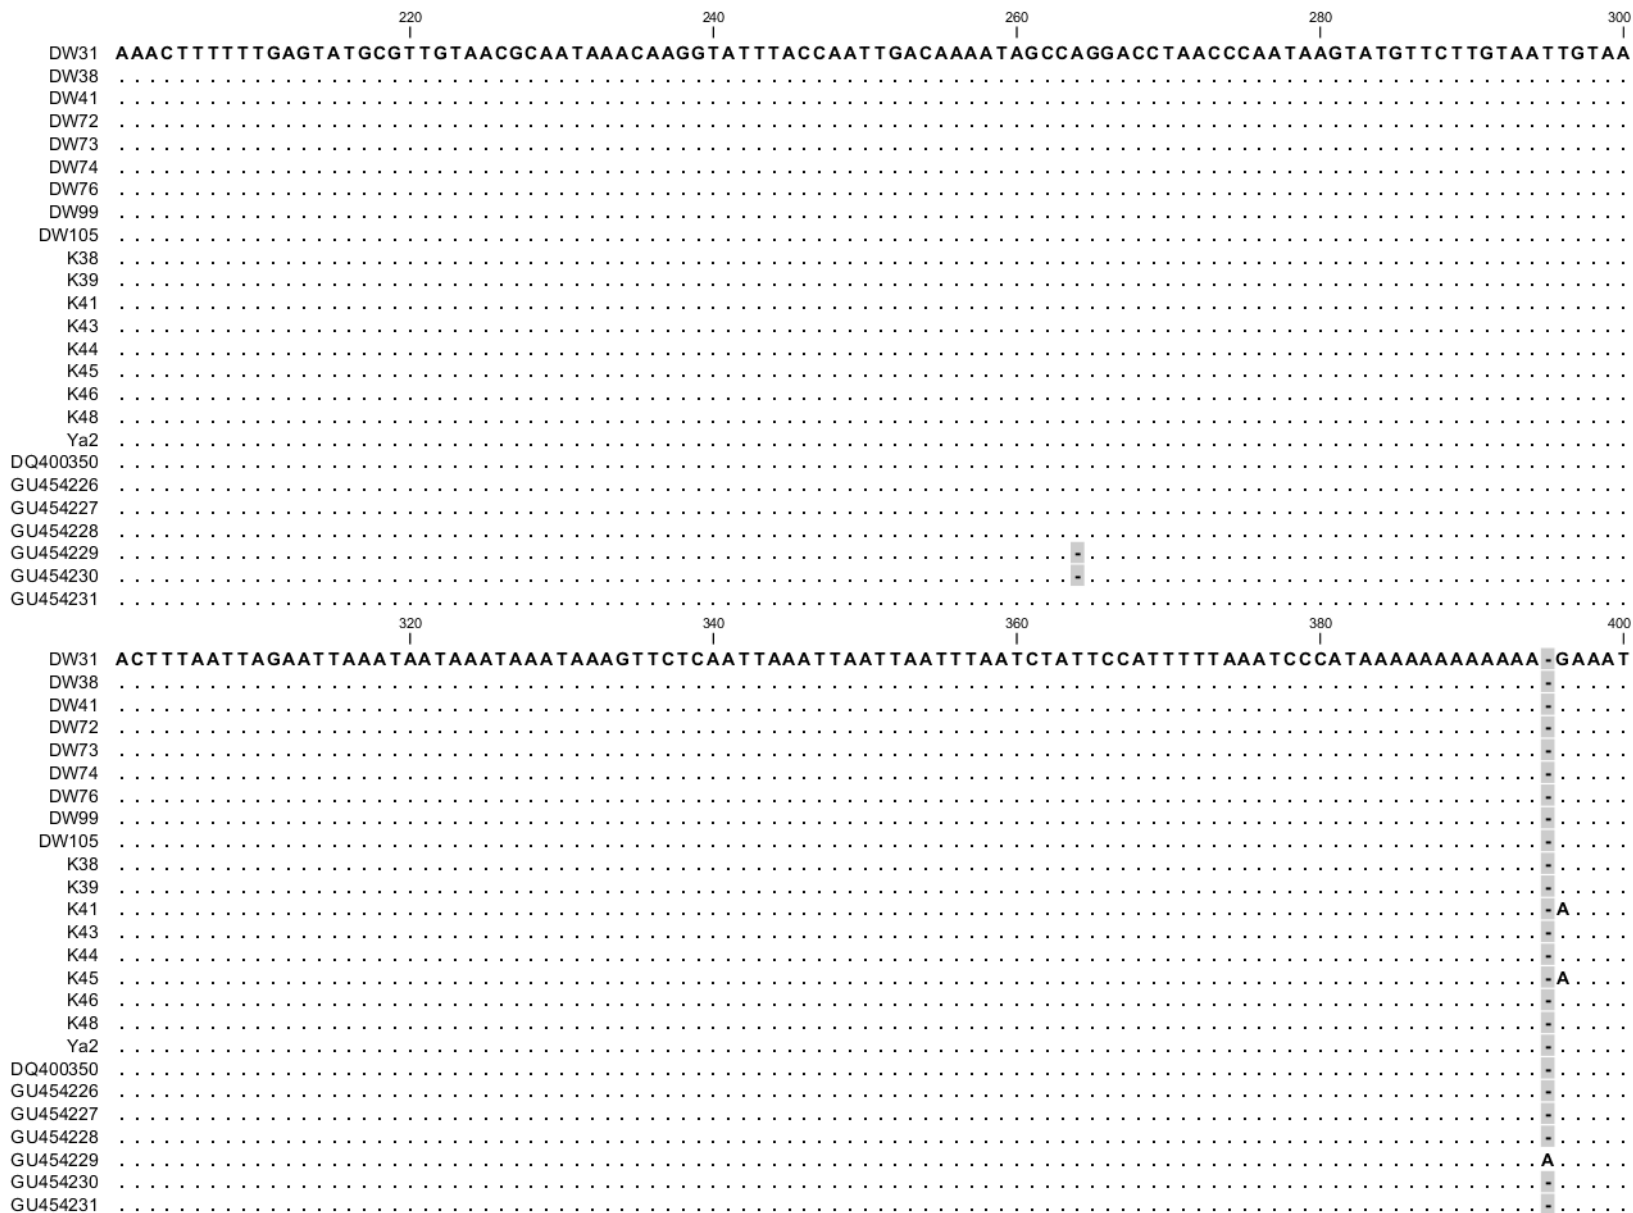

S3A

|          |                                 |                                         |     |     |   |     |     |
|----------|---------------------------------|-----------------------------------------|-----|-----|---|-----|-----|
|          |                                 | 420                                     |     | 440 |   | 460 |     |
|          |                                 |                                         |     |     |   |     |     |
| DW31     | CAAACAAAGGGGGCGAAGTAATACAAAAGGA | CTCTGTTCTTTTTTAGTCCTATCTATAAGAGGAGAGTAT | 470 |     |   |     |     |
| DW38     | .                               | .                                       | .   | .   | . | .   | 470 |
| DW41     | .                               | .                                       | .   | .   | . | .   | 470 |
| DW72     | .                               | .                                       | .   | .   | . | .   | 470 |
| DW73     | .                               | .                                       | .   | .   | . | .   | 470 |
| DW74     | .                               | .                                       | .   | .   | . | .   | 470 |
| DW76     | .                               | .                                       | .   | .   | . | .   | 470 |
| DW99     | .                               | .                                       | .   | .   | . | .   | 470 |
| DW105    | .                               | .                                       | .   | .   | . | .   | 470 |
| K38      | .                               | .                                       | .   | .   | . | .   | 470 |
| K39      | .                               | .                                       | .   | .   | . | A.  | 470 |
| K41      | .                               | .                                       | .   | .   | . | .   | 470 |
| K43      | .                               | .                                       | .   | .   | . | .   | 470 |
| K44      | .                               | .                                       | .   | .   | . | .   | 470 |
| K45      | .                               | .                                       | .   | .   | . | A.  | 470 |
| K46      | .                               | .                                       | .   | .   | . | .   | 470 |
| K48      | .                               | .                                       | G.  | .   | . | A.  | 470 |
| Ya2      | .                               | .                                       | .   | .   | . | .   | 470 |
| DQ400350 | .                               | .                                       | .   | .   | . | .   | 470 |
| GU454226 | .                               | .                                       | .   | .   | . | .   | 470 |
| GU454227 | .                               | .                                       | .   | .   | . | .   | 470 |
| GU454228 | .                               | .                                       | .   | .   | . | .   | 470 |
| GU454229 | .                               | .                                       | .   | .   | . | .   | 470 |
| GU454230 | .                               | .                                       | .   | .   | . | .   | 469 |
| GU454231 | .                               | .                                       | .   | .   | . | .   | 470 |

S3B

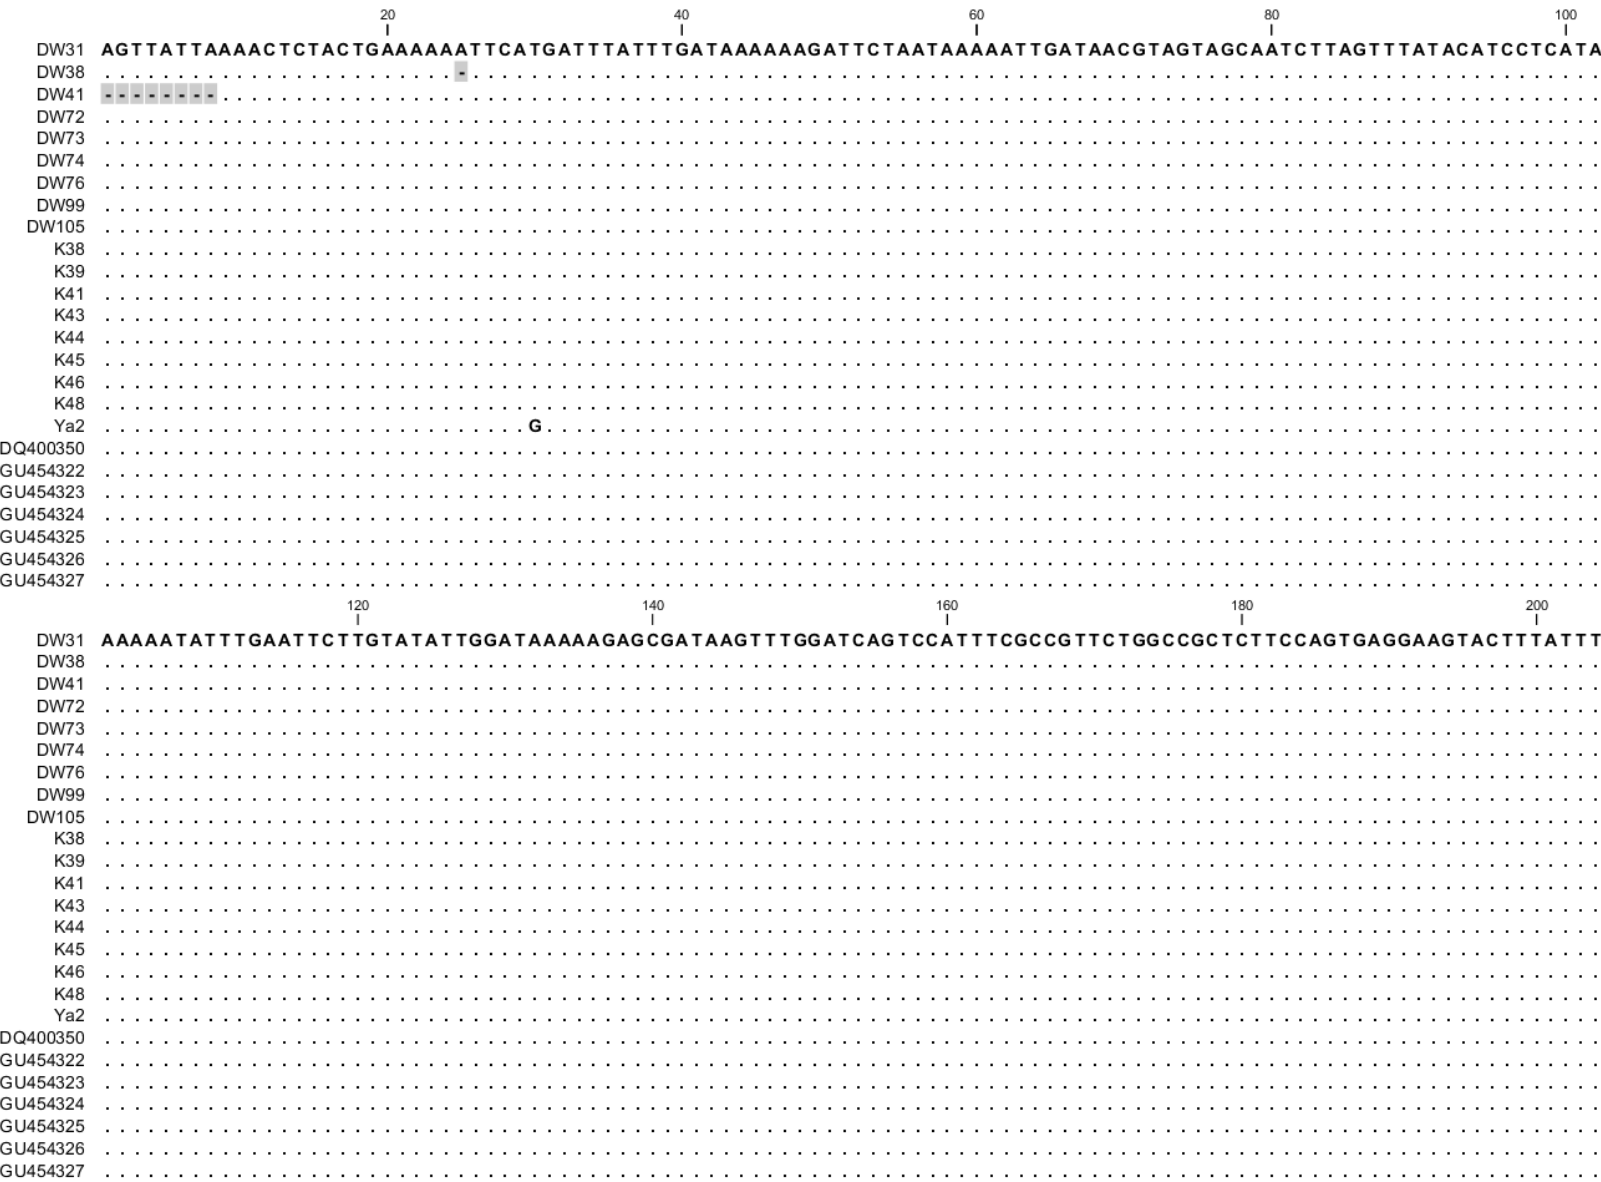

S3B

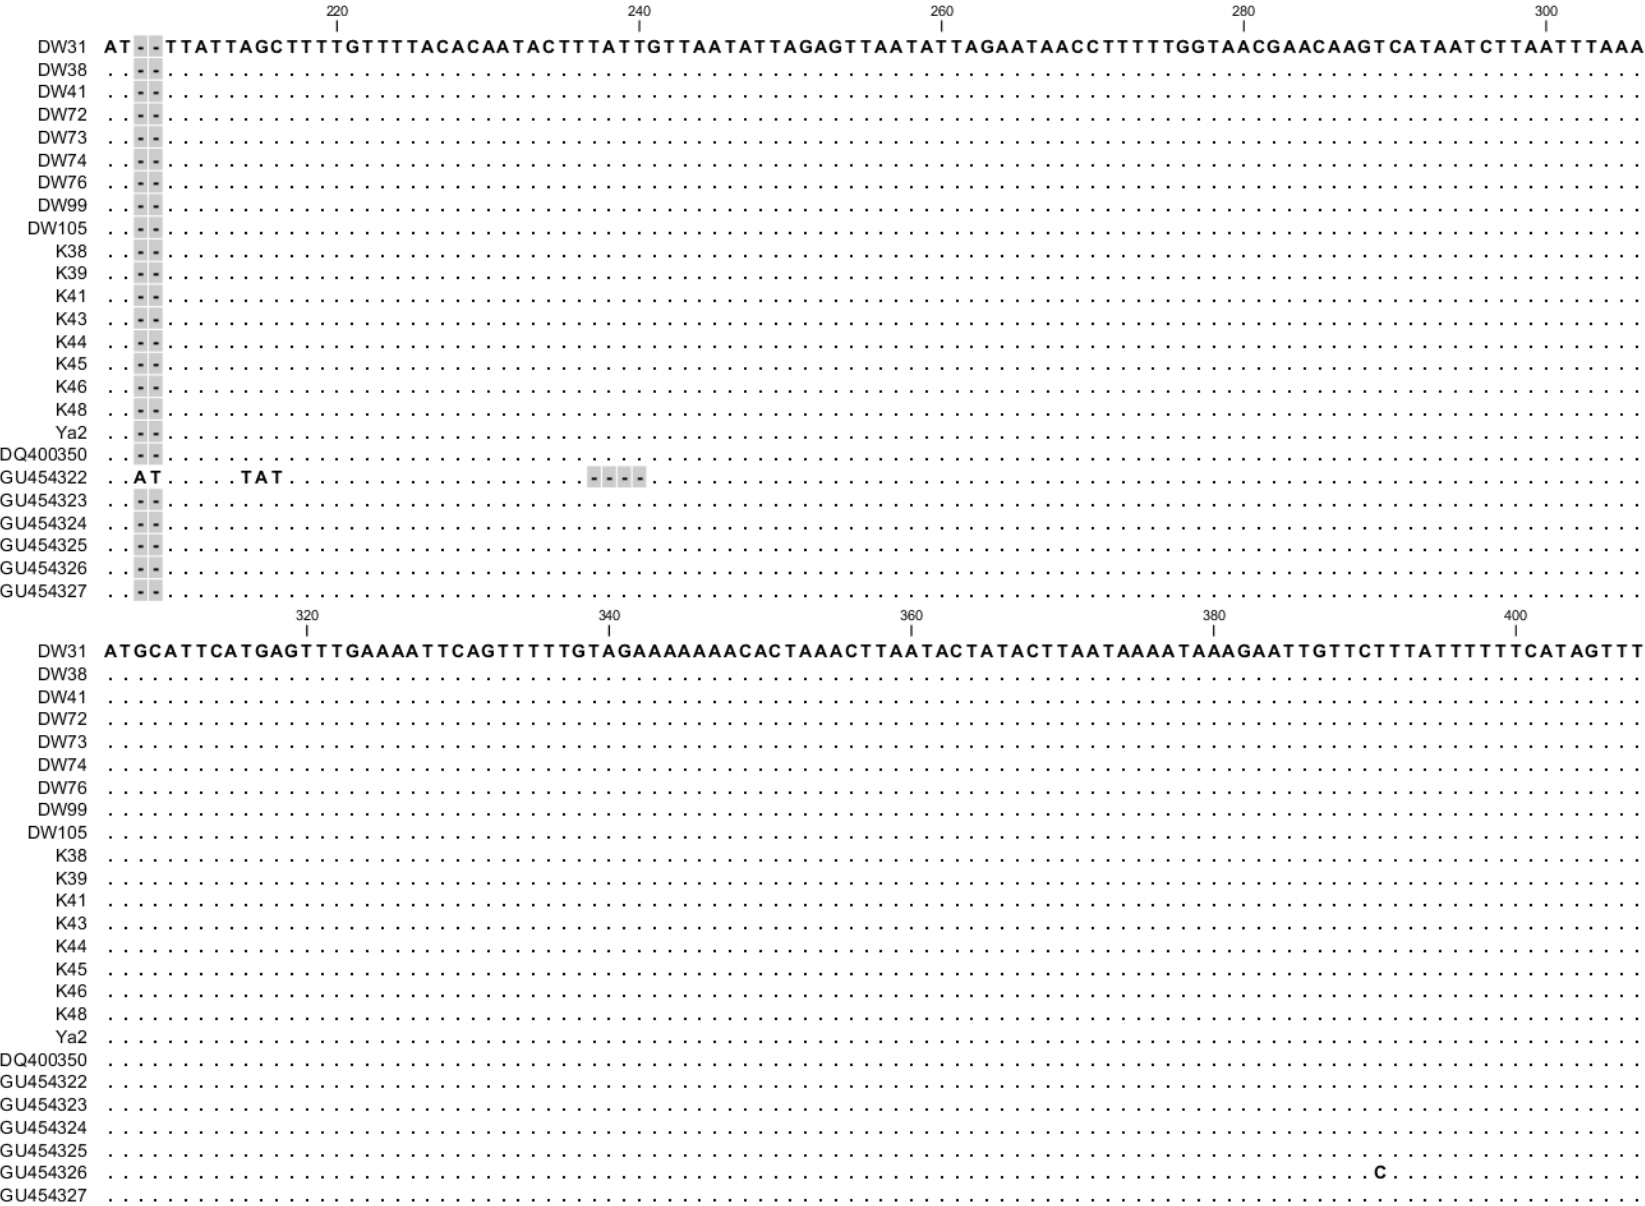

S3B

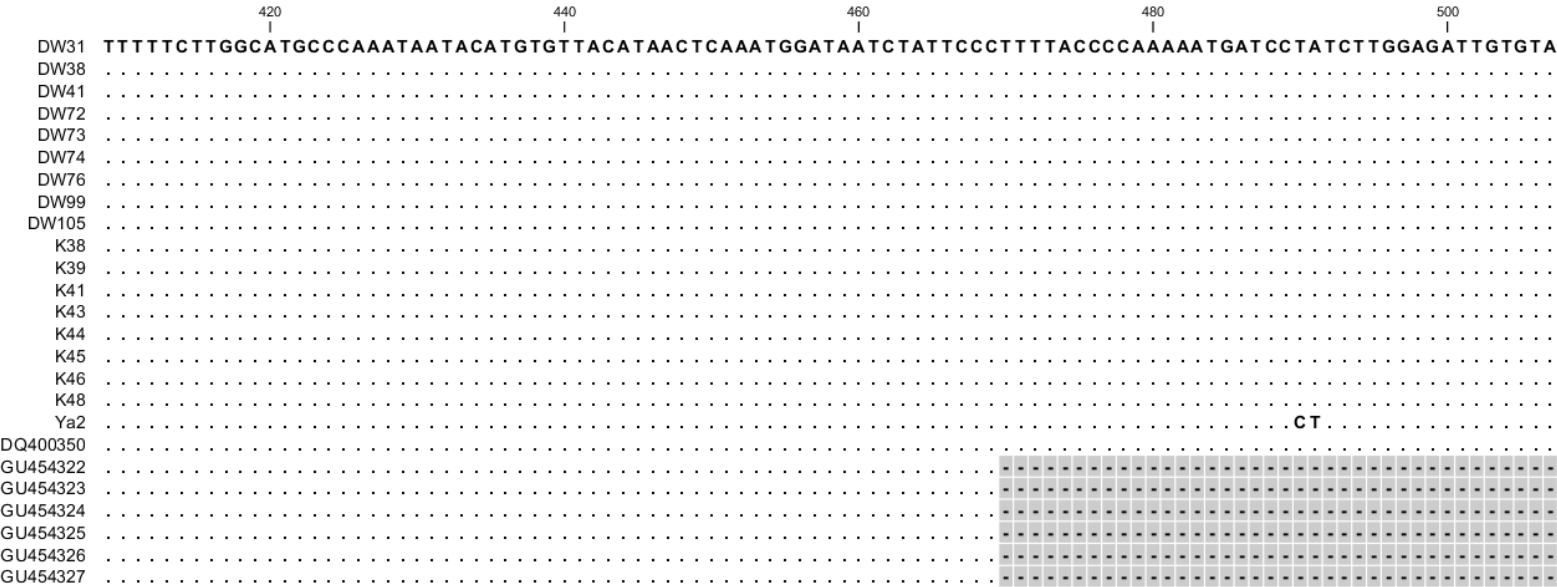

**Supplemental Figure S3.** Nucleotide alignment of *atpH-atpF* and *psbK-psbI* spacers of *Lemna minor* (for ecotypes details see supplemental Table 2). Matching residues are shown as dots.

- A.** Nucleotide alignment of *atpH-atpF* barcodes including the representative sequences of *Le. minor* from different parts of the world available in the GenBank: DQ400350, Russia; GU454226, Turkey; GU454227, USA; GU454228, South Africa; GU454229, Japan; GU454230, Finland; GU454231, Germany.
- B.** Nucleotide alignment of *psbK-psbI* barcodes including the representative sequences of *Le. minor* from different parts of the world available in the GenBank: DQ400350, Russia; GU454322, Turkey; GU454323, USA; GU454324, South Africa; GU454325, Japan; GU454326, Finland; GU454327, Germany.

S4A

DW34 **TTCTAGAATAAAAAAGTACGTCATAGACTTTTTGACTTAGACTTGCTTTTTGCTTCTTCGAATTATATCAAGATTGTACTCTAACAATTACTTATTCGTT**  
 DW95 .....  
 DW97 .....  
 K49 .....  
 GU454236 .....  
 GU454237 .....  
 GU454238 .....  
 DW34 **GAGAGAATACCTCCGGAAGGACTGATTTTAGGATTAGTAATTAGCAGATCCTCTCGCTTTCTTCCTTCCCGTTTTTCAGTTCTTAGTATAATGTAATGCA**  
 DW95 .....  
 DW97 .....  
 K49 .....  
 GU454236 .....  
 GU454237 .....  
 GU454238 .....  
 DW34 **AAACTTTTTTGAGTATGCGTTGTAACGCAACAAACAAAGTATTTATCAATTGACAAAATAGCCAGGACCTAACCCAATAAGTATGTTCTTGTAATTGTAA**  
 DW95 .....  
 DW97 .....  
 K49 .....  
 GU454236 .....  
 GU454237 .....  
 GU454238 .....  
 DW34 **ACTTTAATTAGAATTAATAATAATAAAAAAGTTCTCAATTAAATTAATTAATTTAATCTATTCCATTTTAAATCCCATAAAAAAAGAAATCAAACA**  
 DW95 .....  
 DW97 .....  
 K49 .....  
 GU454236 .....  
 GU454237 .....  
 GU454238 .....  
 DW34 **AA--GGGGGCGAAGTAATACAAAAAGAACTCTGTTCTTTTTTAGTCCTATCTATAAGAGGAGAGTAT**  
 DW95 .....  
 DW97 .....  
 K49 .....  
 GU454236 .....  
 GU454237 .....  
 GU454238 **CAAA**

S4B

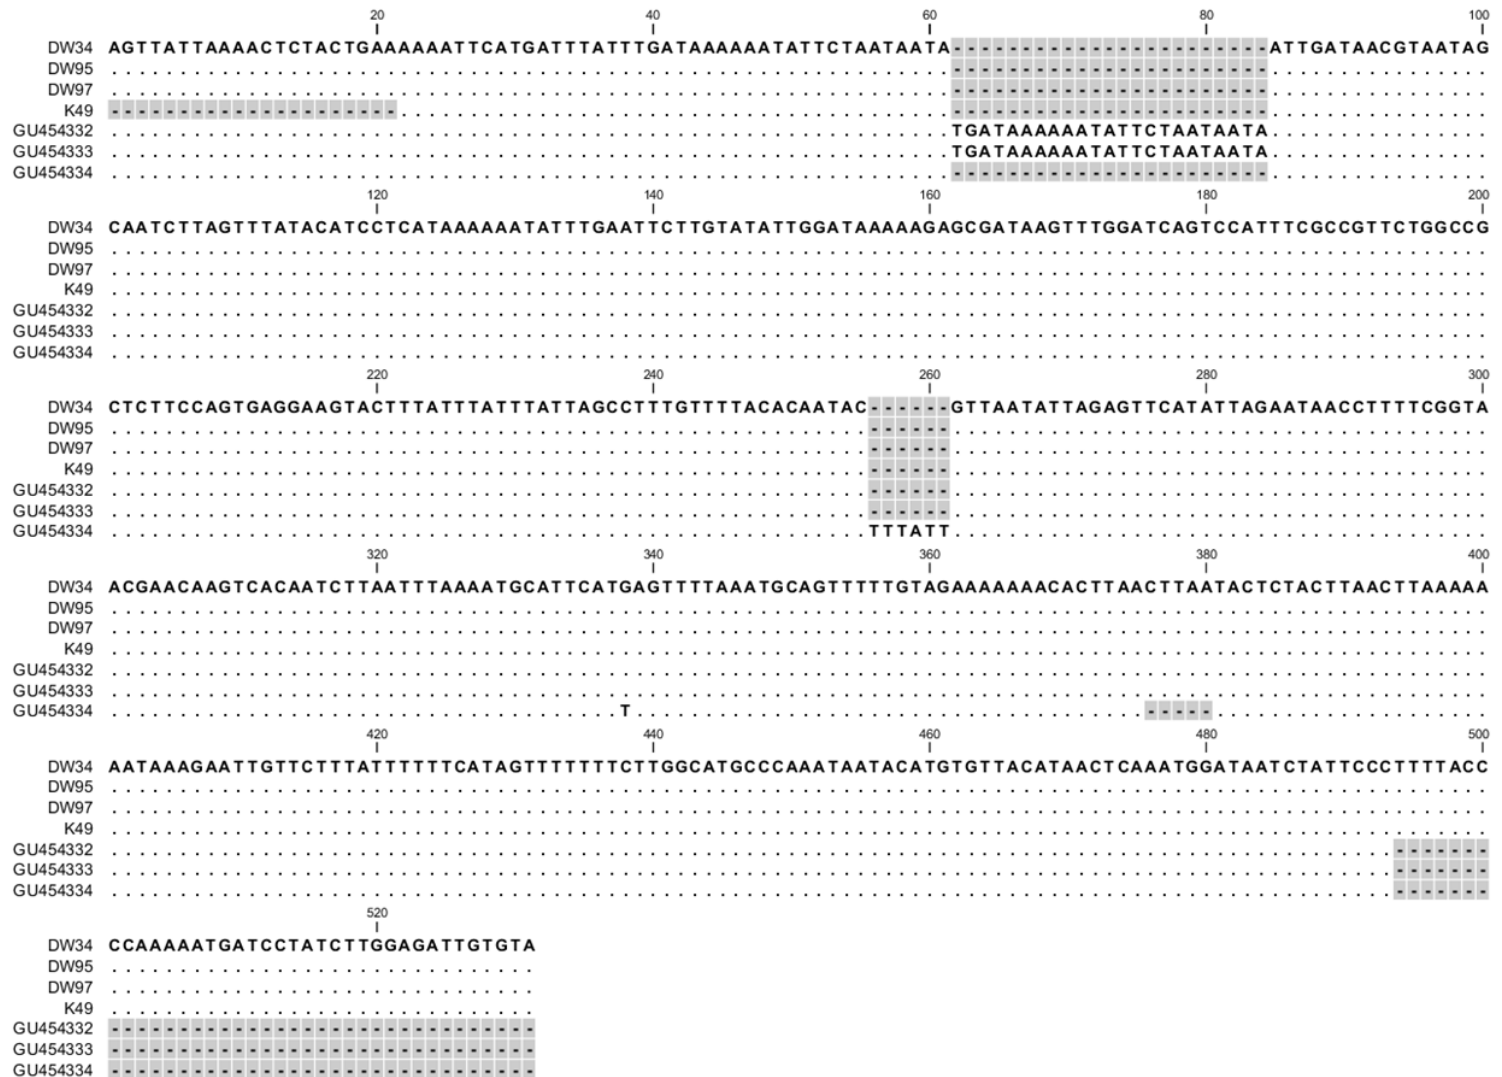

**Supplemental Figure S4.** Nucleotide alignment of *atpH-atpF* and *psbK-psbI* spacers of *Lemna trisulca* (for ecotypes details see supplemental Table 2). Matching residues are shown as dots.

**A.** Nucleotide alignment of *atpH-atpF* barcodes including the representative sequences of *Le. trisulca* from different parts of the world available in the GenBank: GU454236, Canada; GU454237, USA; GU454237, UTCC 399.

**B.** Nucleotide alignment of *psbK-psbI* barcodes including the representative sequences of *Le. trisulca* from different parts of the world available in the GenBank: GU454332, Canada; GU454333, USA; GU454334, UTCC 399.



**S5A**

DW101 **TTCTAGAATAAAAAAGTACGTAATAGACTTTTTGACTTAGACTTGCTTTTTGCTTCTTCGAATTATATCAAGATTGTACTCTAACAATTACTTTATTCGTT**  
 NB0013 .....  
 P2 .....  
 KF726146 .....  
 MG000422 .....  
 GU454240 .....

DW101 **GAGAGAATACCTCCGGAAGGACTGATTTTAGGATTAGTAATTAGCAGATCCTCTCGCTTTCTTCTTCCGTTTTTCAGTTCTTAGTATAATGTAATGCA**  
 NB0013 .....  
 P2 .....  
 KF726146 .....  
 MG000422 .....  
 GU454240 .....

DW101 **AAACTTTTTTTGAGTATGCGTTGTAACGCAACAAACAAGGTATTTATCAATTGACAAAATAGCCAGGATCTAACCCAATAAGTATGTTCTTGAATTATA**  
 NB0013 .....  
 P2 .....  
 KF726146 .....  
 MG000422 .....  
 GU454240 .....

DW101 **AACTTTAATTAGAATTAATAATAAATAAAAAAGTTCTCAATTAAATTAATTAATTAATCTATTCCATTTAAAAATCCCATAAAAAAAAGAAATCAAAAC**  
 NB0013 .....  
 P2 .....  
 KF726146 .....  
 MG000422 .....  
 GU454240 .....

DW101 **AAAGGGGGCGAAGTAATACAAAAAGAACTCTGTTCTTTTTTAGTCCTATCTATAAGAGGAGAGTAT**  
 NB0013 .....  
 P2 .....  
 KF726146 .....  
 MG000422 .....  
 GU454240 .....

S5B

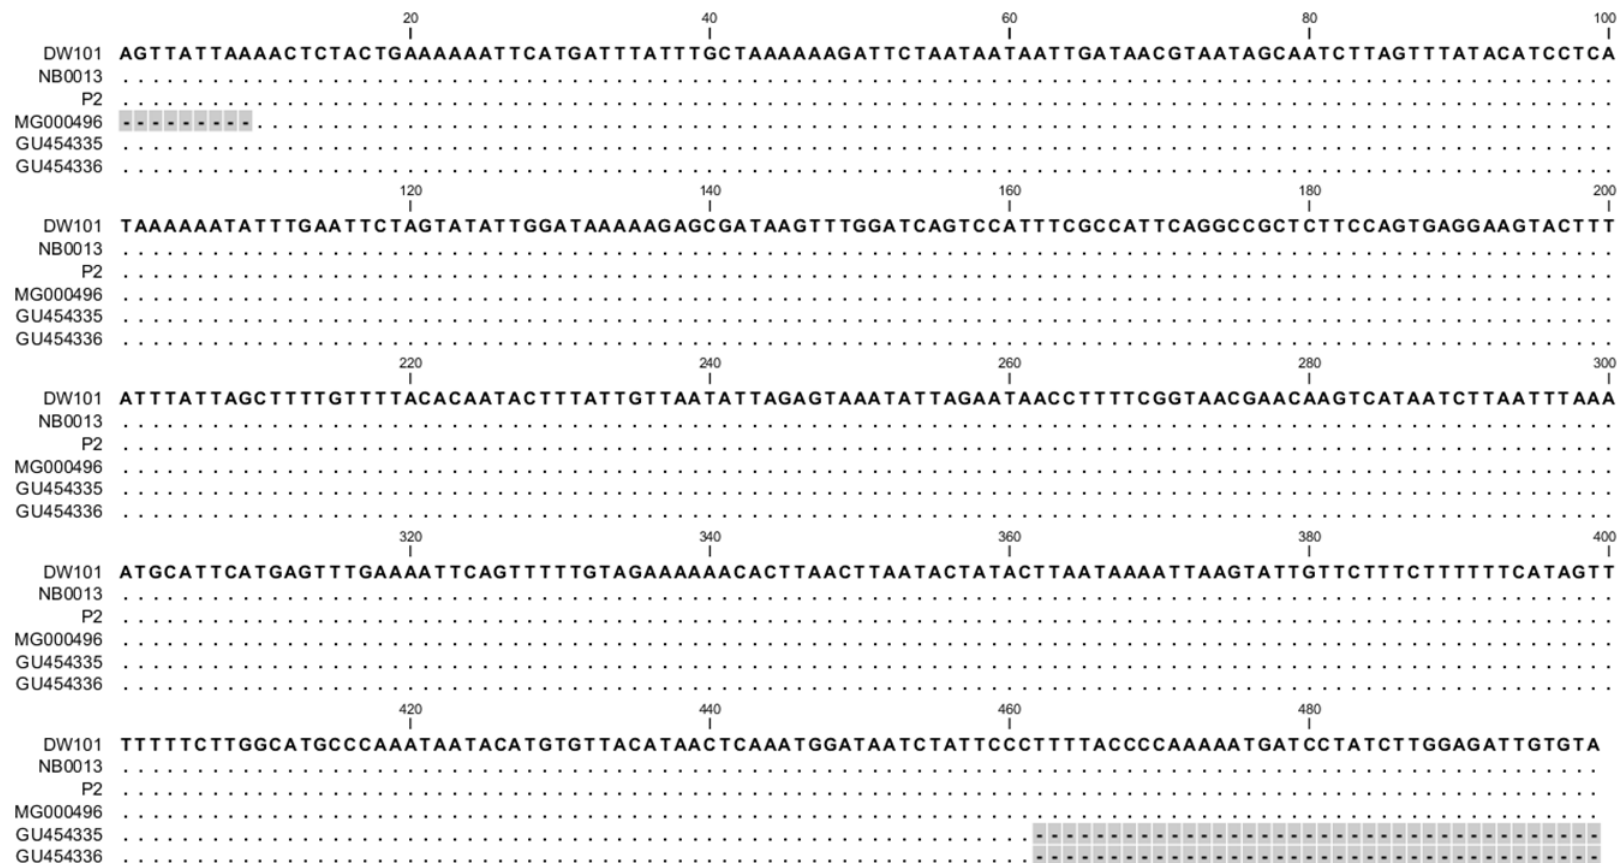

**Supplemental Figure S5.** Nucleotide alignment of *atpH-atpF* and *psbK-psbI* spacers of *Lemna turionifera* (for ecotypes details see supplemental Table 2). Matching residues are shown as dots.

**A.** Nucleotide alignment of *atpH-atpF* barcodes including the representative sequences of *Le. turionifera* from different parts of the world available in the GenBank: KF726146, China; MG000422, Canada; GU454240, Czech.

**B.** Nucleotide alignment of *psbK-psbI* barcodes including the representative sequences of *Le. turionifera* from different parts of the world available in the GenBank: MG000496, Canada; GU454335, China; GU454336, Czech.

**S6A**

DW102 **TTT**TAGAATCAAAAAAGTACGTAATAGACTTTTTGACTTAGACTTGCTTTTTGCTTCTTCGAATTATATCAACATTGTACTCTAACAATTACTTTATTCG  
 KX212889 . . **C** . . . . .  
 GU454219 . . **C** . . . . .  
 GU454220 . . **C** . . . . .  
 GU454221 . . **C** . . . . .  
 GU454222 . . **C** . . . . .

DW102 **TTG**AGAGAATACCTCCGGGAAGGACTGATTTTAGGATTAGTAATTAGCAGATCCTCTCGCTTCTTCTCCTTCCCGTTTTTCAGTTCTTAGTATAATGTAATG  
 KX212889 . . . . .  
 GU454219 . . . . .  
 GU454220 . . . . .  
 GU454221 . . . . .  
 GU454222 . . . . .

DW102 **CAAA**ATTTTTTAGAGTATGCGTTGTAACGCAATAAACAAGGTATTTACCAATTGACAAAAATAGCCAGGACCTAACCCAATAAGTATGTTCTTGTAAATTGT  
 KX212889 . . . . .  
 GU454219 . . . . .  
 GU454220 . . . . .  
 GU454221 . . . . .  
 GU454222 . . . . .

DW102 **AAAC**TTTAATTAGAAATTAATAATAAATAAAAAAGTTCTCAATTAAATTAATTAATTTAATCTATTCCATTTTAAAATCCCATAAAAAAAAGAAATCAAA  
 KX212889 . . . . .  
 GU454219 . . . . .  
 GU454220 . . . . .  
 GU454221 . . . . .  
 GU454222 . . . . .

DW102 **ACA**AAGGGGGCGAAGTAATACAAAAAGAACAGAACCTCTGTTCTTTTTTAGTCCTATCTATAAGAGGAGAGTAT  
 KX212889 . . . . .  
 GU454219 . . . . .  
 GU454220 . . . . .  
 GU454221 . . . . .  
 GU454222 . . . . .

S6B

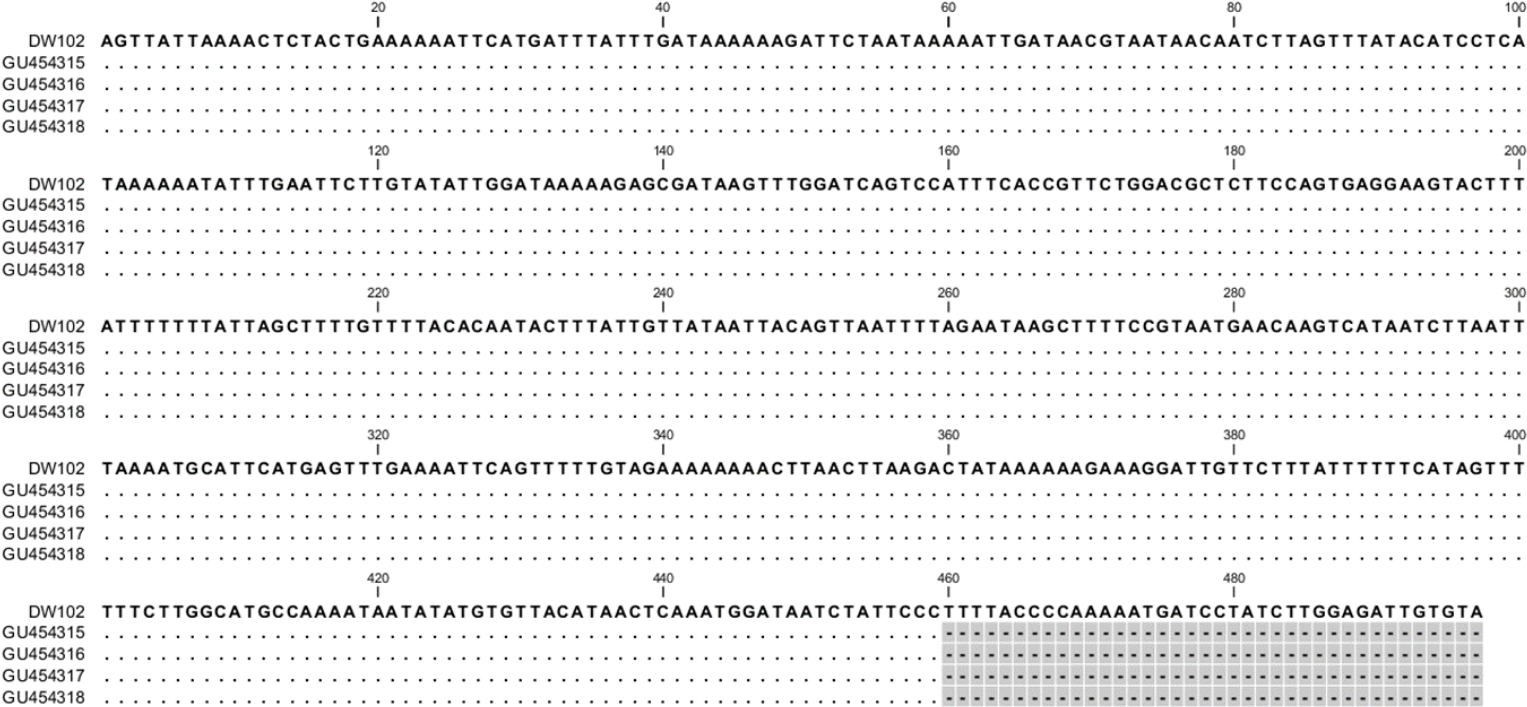

**Supplemental Figure S6.** Nucleotide alignment of *atpH-atpF* and *psbK-psbI* spacers of *Lemna gibba*, ecotype DW102 (Supplemental Table 2). Matching residues are shown as dots.

**A.** Nucleotide alignment of the DW102 *atpH-atpF* barcode with the representative sequences of *Le. gibba* from different parts of the world available in the GenBank: KX212889, China; GU454219, USA; GU454220, Italy; GU454221, Ethiopia; GU454222, Japan.

**B.** Nucleotide alignment of the DW102 *psbK-psbI* barcode with the representative sequences of *Le. gibba* from different parts of the world available in the GenBank: GU454315, USA; GU454316, Italy; GU454317, Ethiopia; GU454318, Japan.

S7A

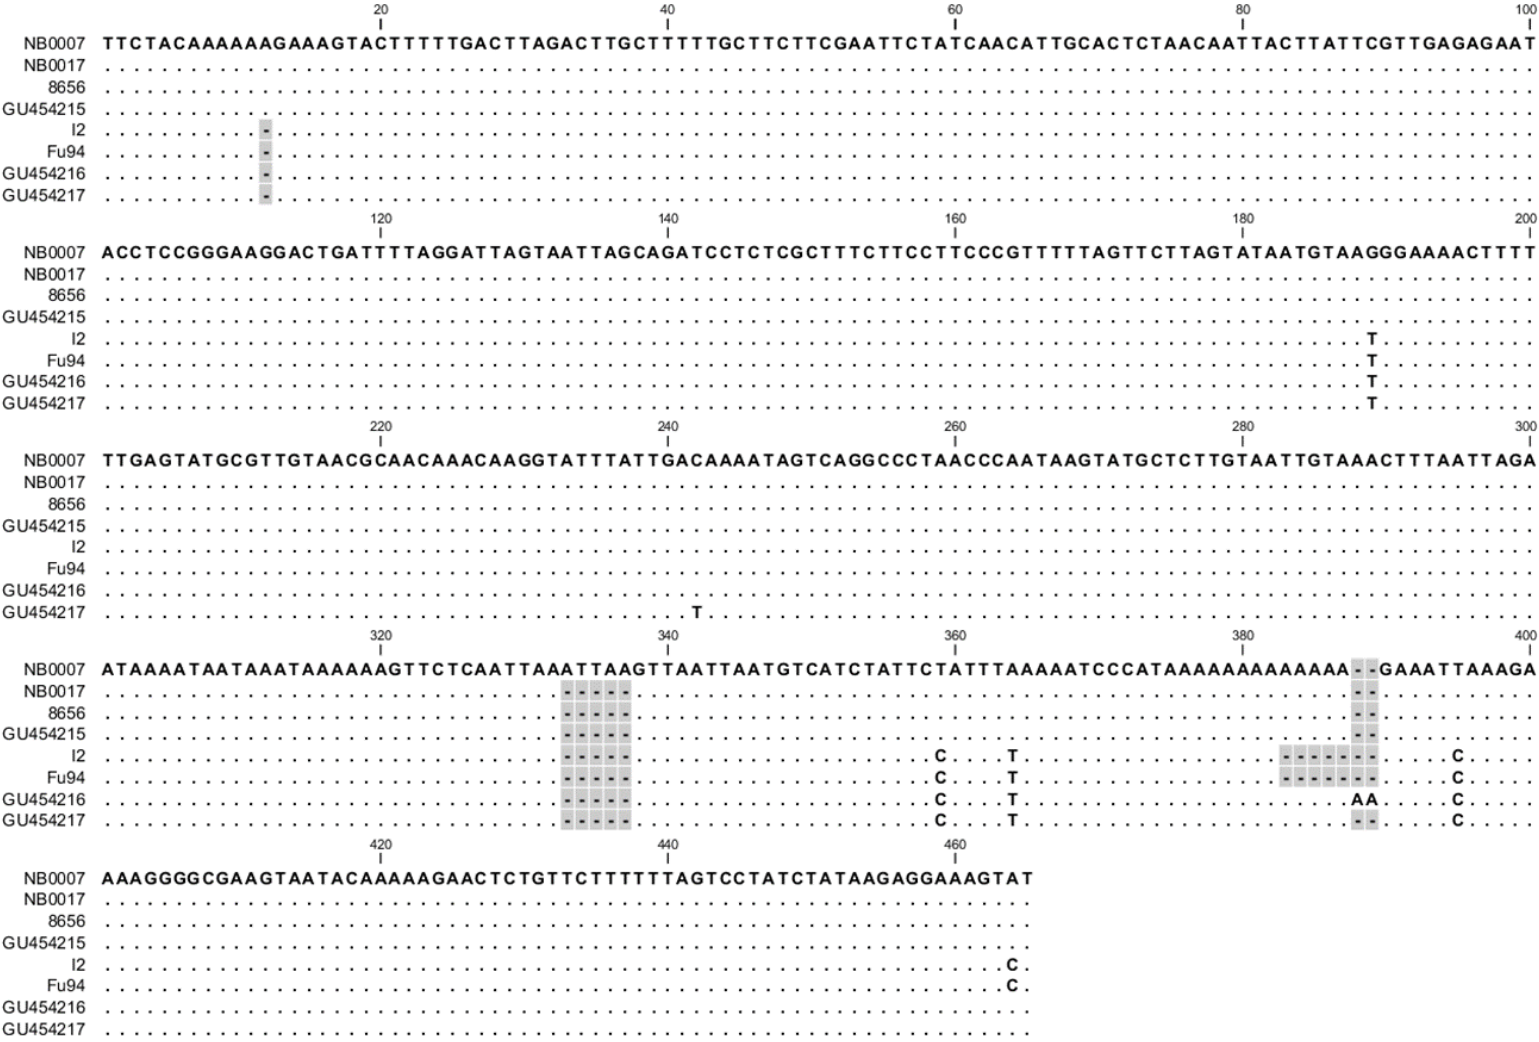

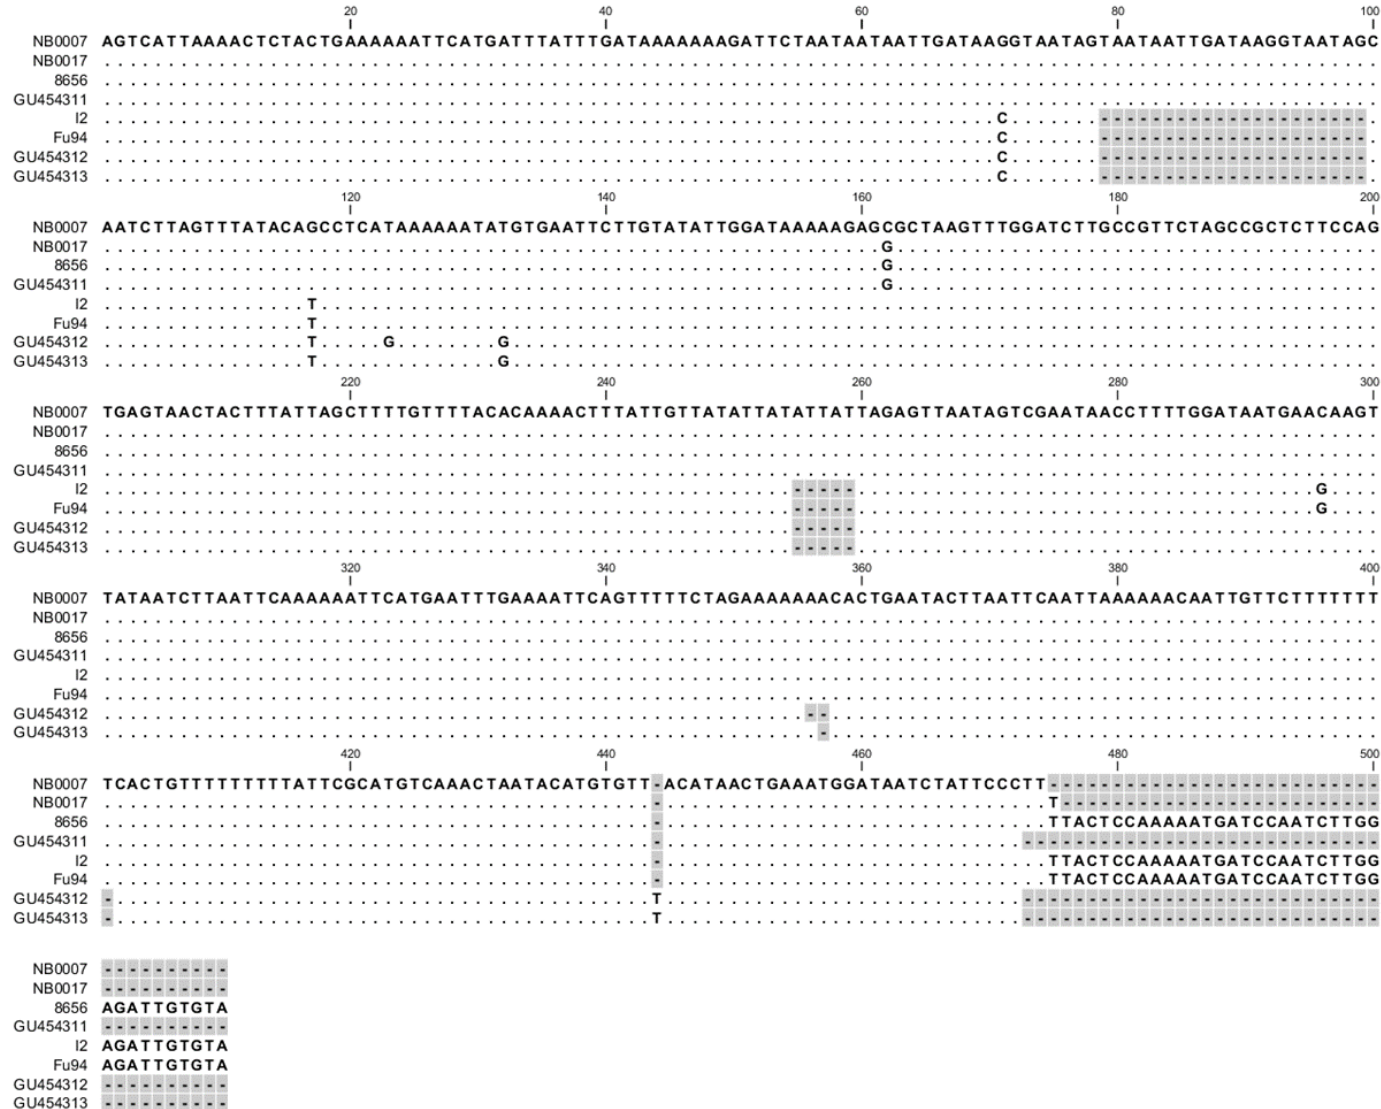

**Supplemental Figure S7.** Nucleotide alignment of *atpH-atpF* and *psbK-psbI* spacers of *Lemna aequinoctialis* (for ecotypes details see supplemental Table 2). Matching residues are shown as dots.

**A.** Nucleotide alignment of *atpH-atpF* barcodes including the representative sequences of *Le. aequinoctialis* from different parts of the world available in the GenBank: GU454215, USA, California, Centerville; GU454216, USA, California, Plainsburg; GU454217, USA, Texas, Austin.

**B.** Nucleotide alignment of *psbK-psbI* barcodes including the representative sequences of *Le. aequinoctialis* from different parts of the world available in the GenBank: GU454311, USA, California, Centerville; GU454312, USA, California, Plainsburg; GU454313, USA, Texas, Austin.

S8A

DW32 TTCTCGAATAAAAAAGTACGTCATAGTGTTTTGACTTAGACTTGCTTTTTGCTTGTTTCGAATTATCTCTAAATTGCACCTATAACAATTACTTATTCGTT  
 DW35 .....  
 MG775412 .....  
 MG775413 .....  
 MG812317 .....  
 DW32 GAGAGAATACCTCCGGAAGGACTGATTTTAGGATTAGTAATTAGCAGATCCTCTCGCTTTCTTCCTCCCGTTTTTAGTTTCGTAGTcTAATGGAAACCT  
 DW35 .....  
 MG775412 .....  
 MG775413 .....  
 MG812317 .....  
 DW32 TTTTLAGTATGCGTTGCAACGCAACAAACAAGGTAGTTATCAATTGACAAAATACCCAGGACCTAACCCAATAAGTAGATTCTTGTAATTGTAAACTTTA  
 DW35 .....  
 MG775412 .....  
 MG775413 .....  
 MG812317 .....  
 DW32 ATTTGTTTTTTTTTATAAAAAATAAAA - GTTTCTCAATTAAATTAATTAATCGATTAAAAATAAAAAATCCCACAAAAAAA - GAAATCAACCAAAGC  
 DW35 .....  
 MG775412 .....  
 MG775413 .....  
 MG812317 .....  
 DW32 AAAGGGGGGG - AGTAATACAAAAAGAACTCTGTTCTTTGTTAGTCCTATCTATAAGAGGAGAGTAT  
 DW35 .....  
 MG775412 .....  
 MG775413 .....  
 MG812317 .....



S8B

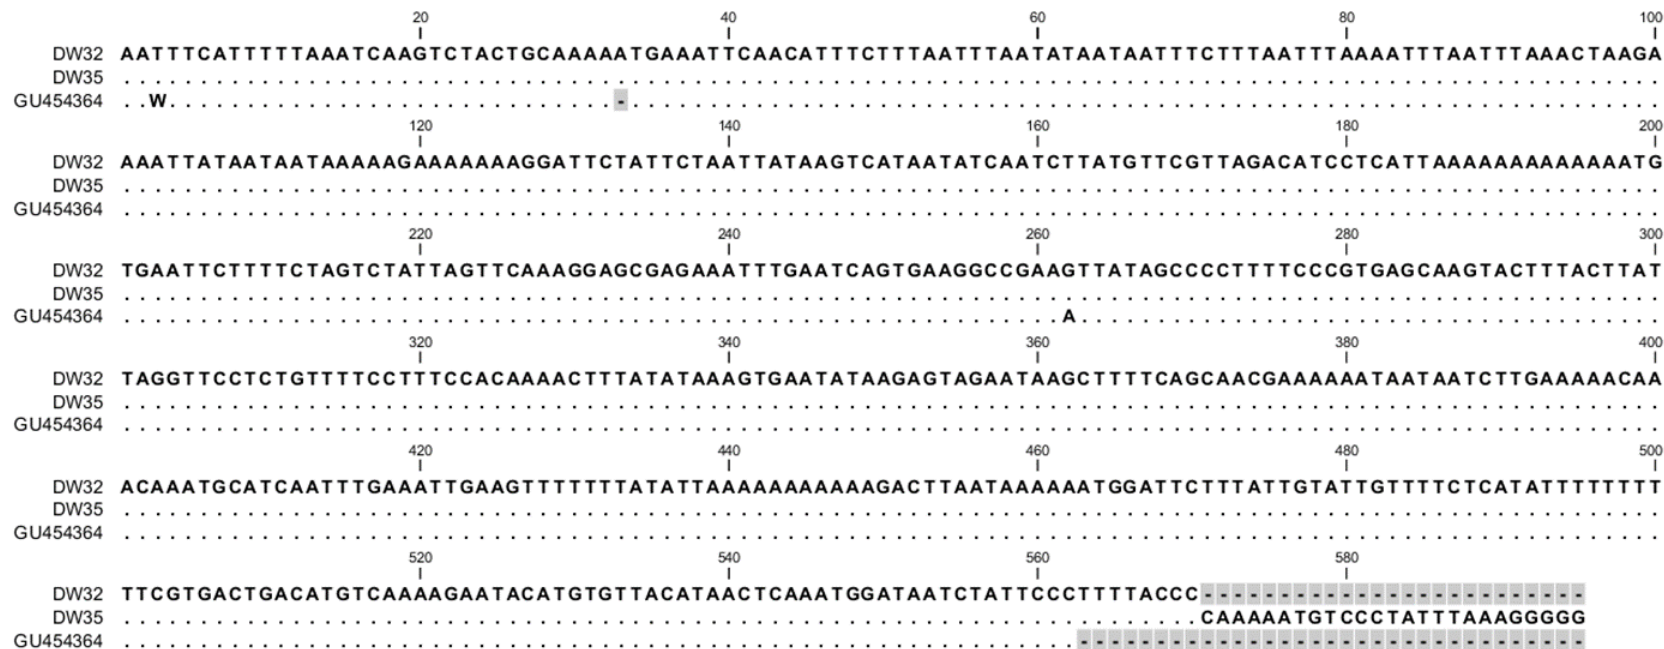

**Supplemental Figure S8.** Nucleotide alignment of *atpH-atpF* and *psbK-psbI* spacers of *Wolffia arrhiza* (for ecotypes details see supplemental Table 2). Matching residues are shown as dots.

**A.** Nucleotide alignment of *atpH-atpF* barcodes including the representative sequences of *W. arrhiza* from different parts of the world available in the GenBank: MG812317, Kenya; MG775412, Italy; MG775413, Brazil.

**B.** Nucleotide alignment of *psbK-psbI* barcodes including the representative sequence of *W. arrhiza* available in the GenBank: GU454364, Hungary.



S9A

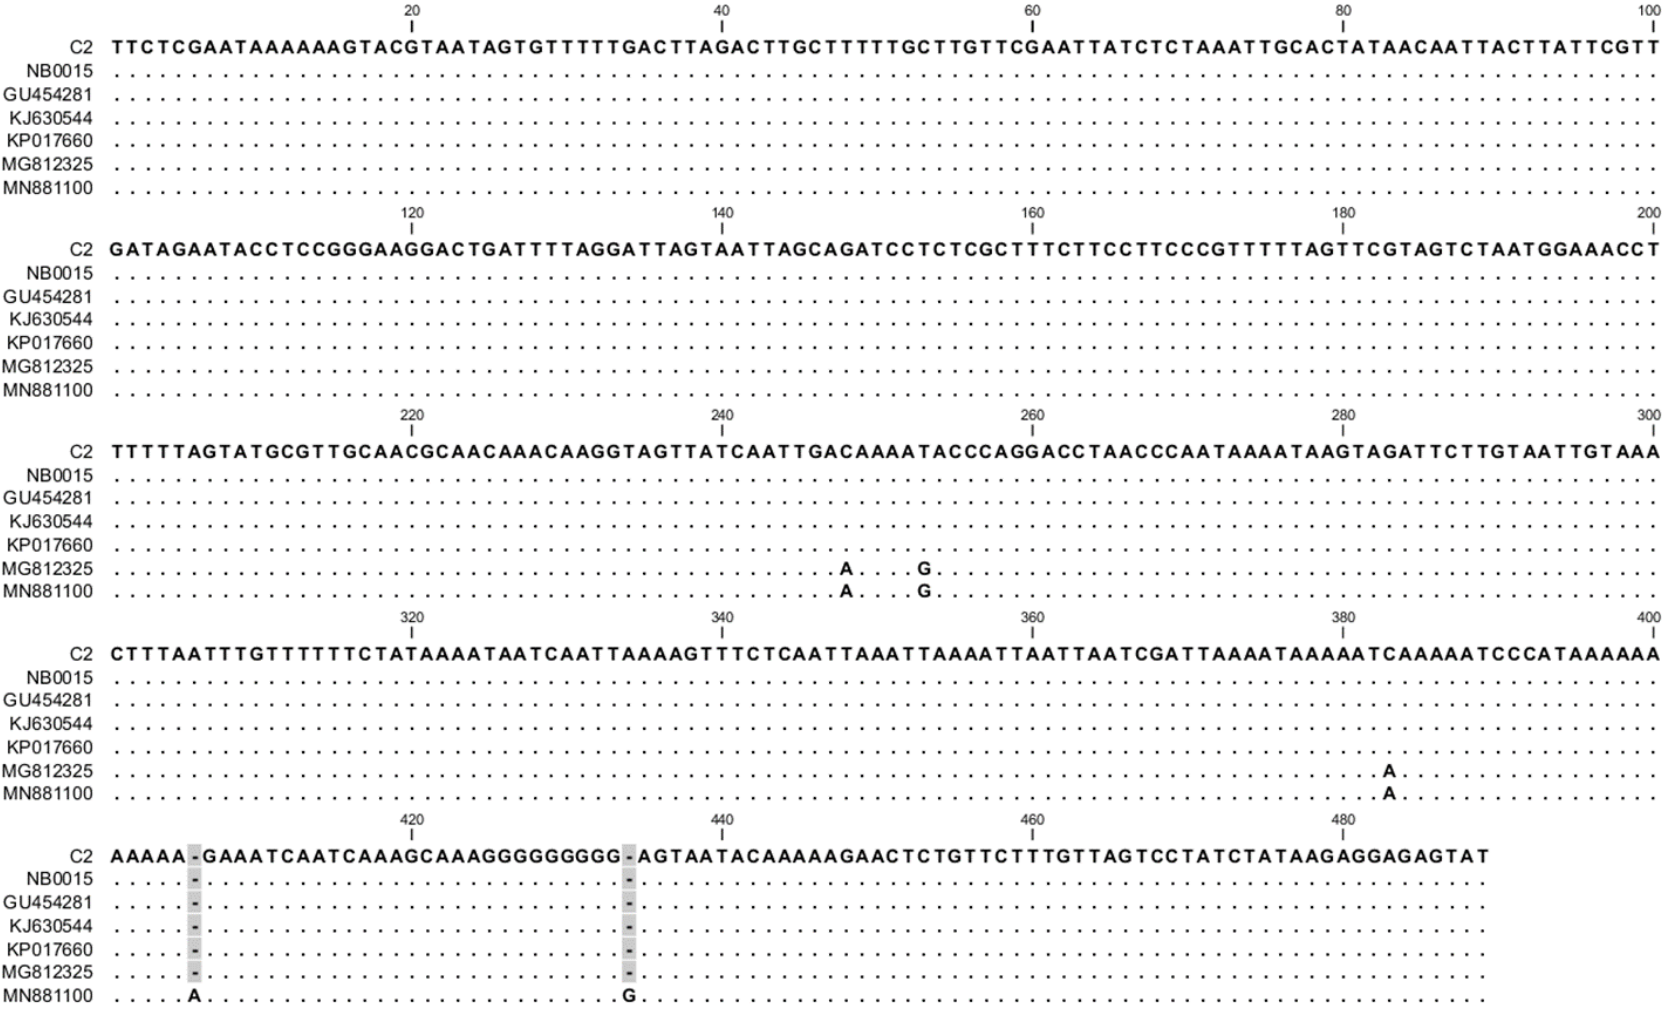

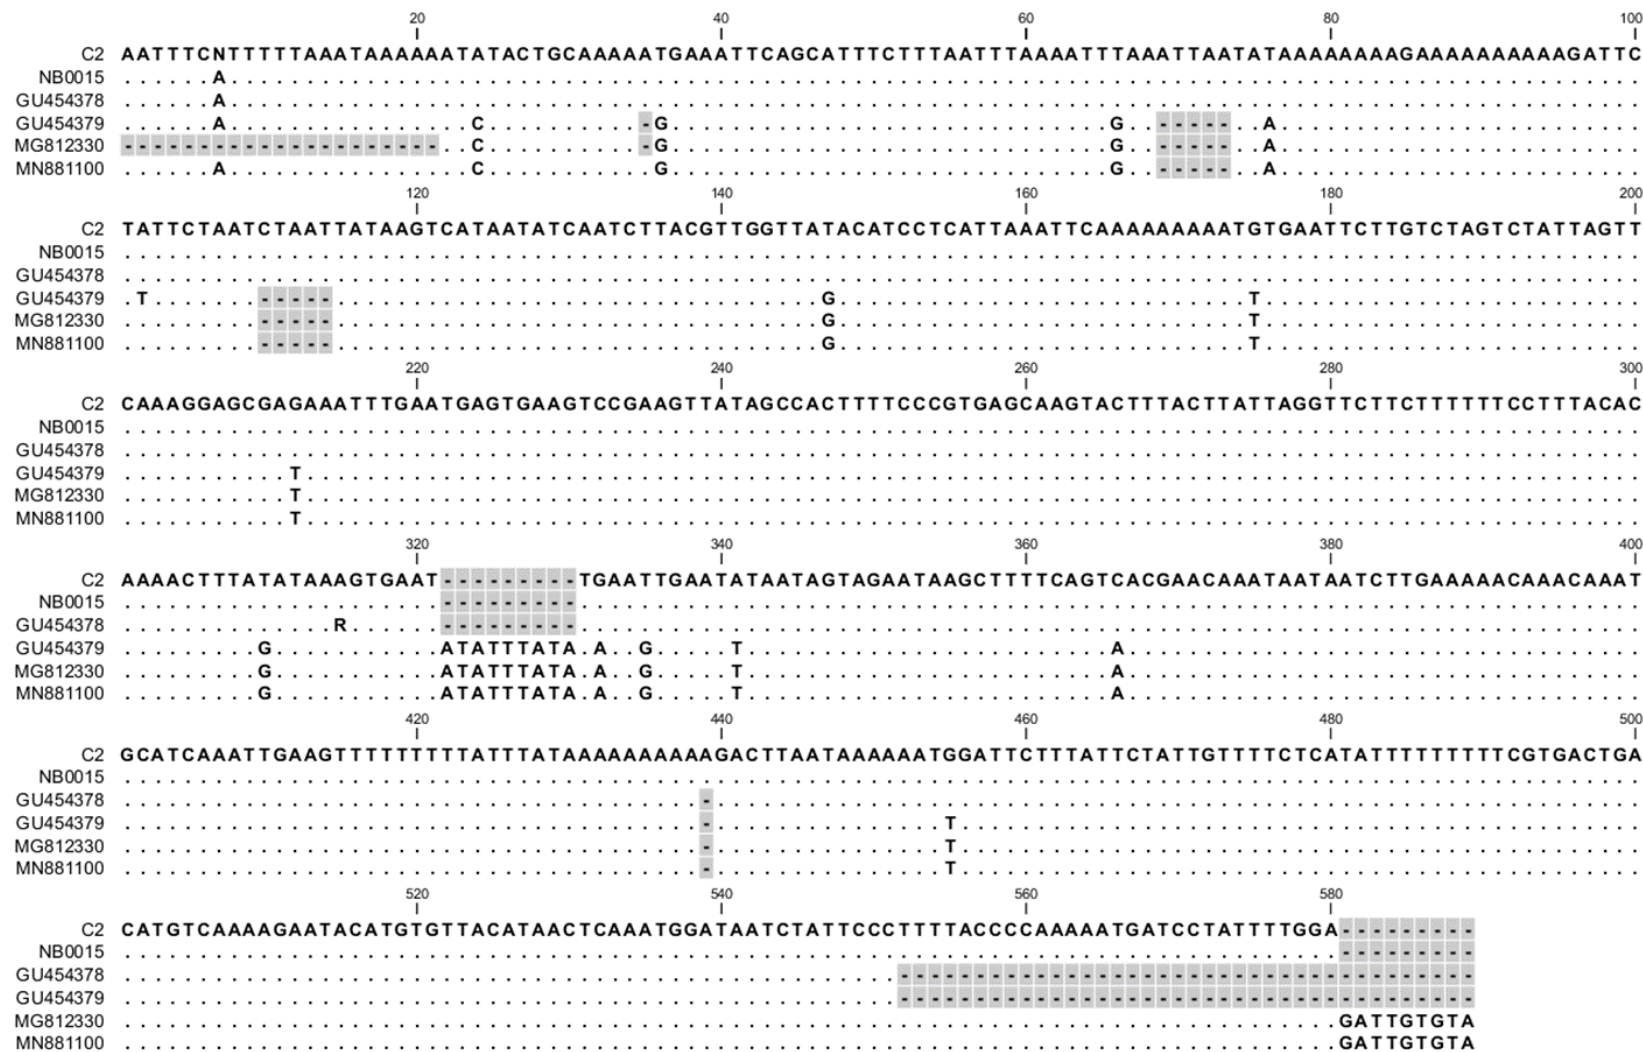

**Supplemental Figure S9.** Nucleotide alignment of *atpH-atpF* and *psbK-psbI* spacers of *Wolffia globosa* (for ecotypes details see supplemental Table 2). Matching residues are shown as dots.

**A.** Nucleotide alignment of *atpH-atpF* barcodes including the representative sequences of *W. globosa* from different parts of the world available in the GenBank: GU454281, USA; KJ630544, China; KP017660, China; MG812325, India; MN881100, Japan.

**B.** Nucleotide alignment of *psbK-psbI* barcodes including the representative sequences of *W. globosa* from different parts of the world available in the GenBank: GU454378, USA; GU454379, Thailand; MG812330, India; MN881100, Japan.
