# Supplementary material for: Biodiversity of Duckweed (Lemnaceae) in Water Reservoirs of Ukraine and China Assessed by Chloroplast DNA Barcoding
Source: MDPI journal article supplement (doi:10.3390/plants11111468), 2022-05-30
Supplement: s1 [file s1]

**Supplemental Table S1.** The number of reference barcodes assigned to the duckweed species analyzed in this work that are publicly available in NCBI. Sequences obtained in this publication are marked by red.

| Species                     | # strains analyzed with <i>psbK-psbI</i> | # strains analyzed with | References                           |
|-----------------------------|------------------------------------------|-------------------------|--------------------------------------|
| <i>Spirodela polyrhiza</i>  | 10+30                                    | 92+30                   | [21, 35, 37, 39, 40, 41, 61, 62, 63] |
| <i>Landoltia punctata</i>   | 8+5                                      | 43+5                    | [39, 40, 41, 61, 62, 63, 64, 65]     |
| <i>Lemna gibba</i>          | 8+1                                      | 12+1                    | [39, 66, 67]                         |
| <i>Lemna minor</i>          | 32+18                                    | 36+18                   | [34, 39, 40, 62, 66, 67, 68]         |
| <i>Lemna turionifera</i>    | 70+3                                     | 75+3                    | [17, 39, 40, 62, 69]                 |
| <i>Lemna trisulca</i>       | 3+4                                      | 4+4                     | [39, 69]                             |
| <i>Lemna aequinoctialis</i> | 4+4                                      | 103+4                   | [39, 40, 41, 61, 62, 64, 69]         |
| <i>Wolffia arrhiza</i>      | 1+2                                      | 7+2                     | [39, 69, 70]                         |
| <i>Wolffia globosa</i>      | 14+2                                     | 31+2                    | [39, 41, 61, 62, 69, 70, 71]         |
| <b>Total:</b>               | <b>219+69</b>                            | <b>472+69</b>           |                                      |
| <b>Sum:</b>                 | <b>691+130</b>                           |                         |                                      |

**Supplemental Table S2.** List of duckweed species genotyped in this study.

| Strain                     | Location of collection                    | GPS                      | AtpH-AtpF<br>Acc # | PsbK-PsbI<br>Acc # |
|----------------------------|-------------------------------------------|--------------------------|--------------------|--------------------|
| <i>Spirodela polyrhiza</i> |                                           |                          |                    |                    |
| DW28                       | Ukraine, Kyiv, Golosijiv Lake             | 50°22'44"N<br>30°30'58"E | OM569492           | OM569553           |
| DW30                       | Ukraine, Kyiv Oblast Tacenky              | 50°09'22"N<br>30°40'21"E | OM569493           | OM569554           |
| DW33                       | Ukraine, Kyiv Oblast, Kruhlyk             | 50°18'12"N<br>30°26'35"E | OM569494           | OM569555           |
| DW36                       | Ukraine, Kyiv Oblast, Kruhlyk             | 50°18'18"N<br>30°26'12"E | OM569495           | OM569556           |
| DW37                       | Ukraine, Kyiv Oblast, Kruhlyk             | 50°18'05"N<br>30°26'06"E | OM569496           | OM569557           |
| DW39                       | Ukraine, Kyiv Oblast, Maliutianka         | 50°17'25"N<br>30°16'20"E | OM569497           | OM569558           |
| DW40                       | Ukraine, Kyiv Oblast, Vita Poshtova       | 50°18'38"N<br>30°23'20"E | OM569498           | OM569559           |
| DW75                       | Ukraine, Rivne Oblast, Pasiky             | 50°16'36"N<br>25°25'58"E | OM793611           | OM793616           |
| DW78                       | Ukraine, Cherkasy Oblast, Luka, river Ros | 49°34'34"N<br>31°26'51"E | OM569499           | OM569560           |

|                                  |                                                                                   |                             |          |          |
|----------------------------------|-----------------------------------------------------------------------------------|-----------------------------|----------|----------|
| DW96                             | Ukraine, Gluboke Lake<br>(The Chernobyl Nuclear<br>Power Plant Exclusion<br>Zone) | 51°26'39" N<br>30°03'54" E  | OM569500 | OM569561 |
| DW98                             | Ukraine, Pripjat river (The<br>Chernobyl Nuclear Power<br>Plant Exclusion Zone)   | 51°16'36" N<br>30°14'28" E  | OM569501 | OM569562 |
| DW100                            | Ukraine, Sumy Oblast,<br>Lyntvarivka                                              | 50°58'58"N<br>34°36'57"E    | OM569502 | OM569563 |
| K40                              | Ukraine, Kyiv Oblast,<br>Borodyanka, Zdvyzh River                                 | 50°38'02"N<br>29°55'42"E    | OM569503 | OM569564 |
| K42                              | Ukraine, Kyiv Oblast, Tal'<br>River near Halynka                                  | 50°40'17"N<br>29°49'49"E    | OM569504 | OM569565 |
| K47                              | Ukraine, Kyiv Oblast,<br>Nemishajeve, local pond                                  | 50°34'21"N<br>30°05'26"E    | OM569505 | OM569566 |
| RDSC 5545                        | China, Jiangsu, Huai'an                                                           | 33°38'41"N<br>118°58'33"E   | OM569506 | OM569567 |
| RDSC 5546                        | China, Jiangsu, channel<br>near Hongze lake                                       | 33°22'43"N<br>118°53'23"E   | OM569507 | OM569568 |
| RDSC 5547                        | China, Jiangsu, Hongze<br>lake                                                    | 33°19'41"N<br>118°51'43"E   | OM569508 | OM569569 |
| RDSC 5548                        | China, Jiangsu, Hongze<br>lake                                                    | 33°17'40"N<br>118°49'45"E   | MZ436185 | MZ436186 |
| NB0003                           | China, Jiangsu, Huai'an                                                           | 33°35'09"N<br>119°01'27"E   | OM569509 | OM569570 |
| NB0004                           | China, Jiangsu, Huai'an,<br>Chinese academia of<br>agriculture, rice field        | 33°28'59"N<br>119°2'1"E     | OM569510 | OM569571 |
| NB0093                           | China,Fujian, Fuzhou                                                              | 26°5'8"N<br>119°17'35"E     | OM569511 | OM569572 |
| G2                               | China, Jiangsu, Huai'an                                                           | 33°38'41"N<br>118°58'33"E   | OM569512 | OM569573 |
| H1                               | China,Jiangsu, Huai'an                                                            | 33°38'41" N<br>118°58'33" E | OM569513 | OM569574 |
| I1                               | China,Jiangsu, Huai'an                                                            | 33°38'41"N<br>119°00'15"E   | OM569514 | OM569575 |
| J1                               | China,Jiangsu, Huai'an                                                            | 33°29'17"N<br>118°58'29"E   | OM569515 | OM569576 |
| L1                               | China,Jiangsu, Huai'an                                                            | 33°35'52"N<br>119°03'09"E   | OM569516 | OM569577 |
| O1                               | China,Jiangsu, Huai'an                                                            | 33°31'12"N<br>119°08'21"E   | OM569517 | OM569578 |
| Ya1                              | China, Shaanxi, Yangling                                                          | 34°18'06"N<br>108°02'22"E   | OM569518 | OM569579 |
| RDSC 2014                        | China, Yunnan, Kunming                                                            | -                           | OM569519 | OM569580 |
| <b><i>Landoltia punctata</i></b> |                                                                                   |                             |          |          |
| NB0014                           | China,Jiangsu, Huai'an                                                            | 33°37'07"N<br>119°00'07"E   | OM569520 | OM569581 |
| NB0022                           | China,Jiangsu, Huai'an                                                            | 33°38'33"N                  | OM569521 | OM569582 |

|                             |                                                   |                           |          |          |
|-----------------------------|---------------------------------------------------|---------------------------|----------|----------|
|                             |                                                   | 119°00'38"E               |          |          |
| Gu1                         | China, Guangxi Zhuang Autonomous Region, Guilin   | 25°16'15"N<br>110°17'44"E | OM569522 | OM569583 |
| Ya3                         | China, Shaanxi, Yangling                          | 34°18'06"N<br>108°02'22"E | OM569523 | OM569584 |
| RDSC EL019                  | China, Yunnan, Kunming                            | -                         | OM569524 | OM569585 |
| <i>Lemna aequinoctialis</i> |                                                   |                           |          |          |
| I2                          | China, Jiangsu, Huai'an                           | 33°38'41"N<br>119°00'15"E | OM569525 | OM569586 |
| NB0017                      | China, Jiangsu, Huai'an                           | 33°37'07"N<br>119°00'07"E | OM569526 | OM569587 |
| NB0007                      | China, Shanghai                                   | 31°13'52"N<br>121°28'19"E | MZ436181 | MZ436182 |
| Fu94                        | China, Fujian, Fuzhou                             | 26°5'8"N<br>119°17'35"E   | OM569527 | OM569588 |
| <i>Lemna gibba</i>          |                                                   |                           |          |          |
| DW102                       | Ukraine, Donetsk Oblast, Mironovsky               | 48°28'04"N<br>38°16'14"E  | OM569528 | OM569589 |
| <i>Lemna minor</i>          |                                                   |                           |          |          |
| DW31                        | Ukraine, Kyiv Oblast Tachenky                     | 50°09'22"N<br>30°40'21"E  | OM569529 | OM569590 |
| DW38                        | Ukraine, Kyiv Oblast, Maliutianka                 | 50°17'25"N<br>30°16'20"E  | OM569530 | OM569591 |
| DW41                        | Ukraine, Kyiv, Feofaniia                          | 50°20'28"N<br>30°29'23"E  | OM569531 | OM569592 |
| DW72                        | Ukraine, Cherkasy Oblast, Luka, river Ros         | 49°34'34"N<br>31°26'51"E  | OM793612 | OM793617 |
| DW73                        | Ukraine, Rivne Oblast, Pasiky                     | 50°16'36"N<br>25°25'58"E  | OM793613 | OM793618 |
| DW74                        | Ukraine, Khmelnytskyi Oblast, Kamianets-Podilskyi | 48°40'24"N<br>26°33'57"E  | OM793614 | OM793619 |
| DW76                        | Ukraine, Cherkasy Oblast, Korsun-Shevchenkivskyi  | 49°26'07"N<br>31°15'04"E  | OM793615 | OM793620 |
| DW99                        | Ukraine, Sumy Oblast, Lyntvarivka                 | 50°58'58"N<br>34°36'57"E  | OM569532 | OM569593 |
| DW105                       | Ukraine, Volyn Oblast, Vysochne                   | 51°52'34"N<br>24°31'08"E  | OM569533 | OM569594 |
| K38                         | Ukraine, Kyiv Oblast, Borodyanka, Zdvyzh River    | 50°38'02"N<br>29°55'42"E  | OM569534 | OM569595 |
| K39                         | Ukraine, Kyiv Oblast, Borodyanka, Zdvyzh River    | 50°38'02"N<br>29°55'42"E  | OM569535 | OM569596 |
| K41                         | Ukraine, Kyiv Oblast, Borodyanka, Zdvyzh River    | 50°38'02"N<br>29°55'42"E  | OM569536 | OM569597 |
| K43                         | Ukraine, Kyiv Oblast, Horenka, Irpin River        | 50°33'19"N<br>30°17'02"E  | OM569537 | OM569598 |
| K44                         | Ukraine, Kyiv Oblast, Horenka, Irpin River        | 50°33'19"N<br>30°17'02"E  | OM569538 | OM569599 |
| K45                         | Ukraine, Kyiv Oblast, Vorzel                      | 50°33'06"N<br>30°09'19"E  | OM569539 | OM569600 |

|                                 |                                                                                   |                              |          |          |
|---------------------------------|-----------------------------------------------------------------------------------|------------------------------|----------|----------|
| K46                             | Ukraine, Kyiv Oblast,<br>Nemishajeve                                              | 50°34'21"N<br>30°05'26"E     | OM569540 | OM569601 |
| K48                             | Ukraine, Kyiv Oblast,<br>Nemishajeve                                              | 50°34'21"N<br>30°05'26"E     | OM569541 | OM569602 |
| Ya2                             | China, Shaanxi, Yangling                                                          | 34°18'06"N<br>108°02'22"E    | OM569542 | OM569603 |
| <b><i>Lemna trisulca</i></b>    |                                                                                   |                              |          |          |
| DW34                            | Ukraine, Kyiv Oblast,<br>Kruhlyk                                                  | 50°18'12"N<br>30°26'35"E     | OM569543 | OM569604 |
| DW95                            | Ukraine, Gluboke Lake<br>(The Chernobyl Nuclear<br>Power Plant Exclusion<br>Zone) | 51°26'39" N<br>30°03'54" E   | OM569544 | OM569605 |
| DW97                            | Ukraine, Pripjat river (The<br>Chernobyl Nuclear Power<br>Plant Exclusion Zone)   | 51°16'36" N<br>30°14'28" E   | OM569545 | OM569606 |
| K49                             | Ukraine, Kyiv Oblast,<br>Nemishajeve                                              | 50°34'21"N<br>30°05'26"E     | OM569546 | OM569607 |
| <b><i>Lemna turionifera</i></b> |                                                                                   |                              |          |          |
| DW101                           | Ukraine, Donetsk Oblast,<br>Mironovsky                                            | 48°28'04"N<br>38°16'14"E     | OM569547 | OM569608 |
| NB0013                          | China, Jiangsu, Huai'an                                                           | 33°37'07"N<br>119°00'07"E    | MZ436179 | MZ436180 |
| P2                              | China, Jiangsu, Huai'an                                                           | 33°35'52"N<br>119°03'09"E    | OM569548 | OM569609 |
| <b><i>Wolffia arrhiza</i></b>   |                                                                                   |                              |          |          |
| DW32                            | Ukraine, Kyiv Oblast<br>Tacenky                                                   | 50°09'22"N<br>30°40'21"E     | OM569549 | OM569610 |
| DW35                            | Ukraine, Kyiv Oblast,<br>Kruhlyk                                                  | 50°18'12.5"N<br>30°26'35.9"E | OM569550 | OM569611 |
| <b><i>Wolffia globosa</i></b>   |                                                                                   |                              |          |          |
| C2                              | China, Jiangsu, Huai'an                                                           | 33°34'39"N<br>118°51'30"E    | OM569551 | OM569612 |
| NB0015                          | China, Jiangsu, Huai'an                                                           | 33°33'24"N<br>118°51'38"E    | MZ436183 | MZ436184 |
